# Supplementary material for: Millennial-scale atmospheric CO 2 variations during the Marine Isotope Stage 6 period (190–135 ka)
Source: Copernicus journal article supplement (doi:10.5194/cp-16-2203-2020), 2020-11-14
Supplement: Supplementary file 1 [file cp-16-2203-2020-supplement.zip]

Archive with 3 entries (3 files):
- cp-16-2203-2020-supplement-title-page.pdf
- Supplement.pdf
- CO2, CH4 and d15N during the MIS 6 Shin et al., 2020.xlsx
