# Supplementary material for: Millennial-scale atmospheric CO 2 variations during the Marine Isotope Stage 6 period (190–135 ka)
Source: Copernicus journal article supplement (doi:10.5194/cp-16-2203-2020), 2020-11-14
Supplement: Supplementary file 1 [file cp-16-2203-2020-supplement.zip › CO2, CH4 and d15N during the MIS 6 Shin et al., 2020.xlsx]

## Sheet: CO2 Composite
	Composite CO2 record				Smoothing curve of composite CO2 data set
	Age [ka]	CO2 [ppm]	CO2 error (1sigma) [ppm]		Age [ka]	CO2 [ppm]	CO2 error (1sigma) [ppm]
	135.274	198.332	1.22513		135.274	206.154	0.9379
	135.453	199.34	0.79		135.524	199.422	1.0649
	135.73	196.664	0.83		135.774	196.019	1.0928
	135.73	197.264	2.36		136.024	198.229	0.9734
	135.962	196.798	0.954368		136.274	196.721	0.8743
	136.317	200.292	1		136.524	195.161	0.9056
	136.515	194.578	0.79		136.774	193.532	1.0965
	136.73	191.084	1.14		137.024	192.236	1.0204
	137.104	193.951	0.79		137.274	193.154	1.0678
	137.43	193.209	1.5		137.524	193.716	0.9928
	137.453	192.851	0.4		137.774	193.508	1.1729
	137.76	194.414	1.99		138.024	193.063	1.1591
	137.845	192.452	1.32695		138.274	192.012	1.1798
	138.46	192.582	1.08		138.524	190.736	1.0465
	138.556	189.694	1.6		138.774	189.752	1.0192
	138.91	188.724	2.09		139.024	188.642	0.9538
	139.01	189.18	0.79		139.274	187.967	0.912
	139.51	186.842	0.19		139.524	186.829	1.0317
	139.601	187.198	0.4		139.774	185.951	1.1597
	140.07	184.014	1.66		140.024	185.021	1.2917
	140.113	185.242	0.954896		140.274	184.829	1.3315
	140.43	186.367	1.04		140.524	185.168	1.175
	140.62	181.704	4.12		140.774	185.332	1.1579
	140.649	184.815	1.16008		141.024	185.855	1.2225
	140.737	186.455	0.888032		141.274	188.609	1.4953
	141.27	186.169	1.20886		141.524	190.393	1.2211
	141.76	195.447	0.836304		141.774	192.522	1.0705
	141.92	190.543	0.95		142.024	193.024	1.1474
	141.995	191.421	0.7		142.274	191.416	1.1522
	142.01	190.704	1.83		142.524	190.358	1.1026
	142.147	194.406	2.06		142.774	190.237	1.0496
	142.628	188.019	0.770072		143.024	190.035	0.9512
	143.012	191.868	0.877027		143.274	190.592	0.9238
	143.22	188.637	1.5		143.524	190.159	0.9281
	143.261	189.418	0.2		143.774	189.524	0.9932
	143.499	190.914	0.80198		144.024	189.448	1.1586
	143.773	189.872	0.968507		144.274	189.483	1.1219
	143.832	187.826	0.780523		144.524	190.377	1.08
	144.33	190.035	1.5		144.774	191.742	1.1223
	144.401	187.964	0.6		145.024	191.337	1.1257
	144.608	191.353	1.41723		145.274	190.325	0.996
	144.915	192.027	1.30363		145.524	189.234	1.0033
	145.242	192.486	0.81459		145.774	189.221	1.4394
	145.42	187.579	0.64		146.024	190.132	2.1538
	145.451	186.657	1.1		146.274	191.619	2.6249
	145.651	187.984	1.23354		146.524	191.664	2.4305
	146.222	192.248	3.17188		146.774	191.047	1.8178
	147.16	189.932	1.028		147.024	190.402	1.4702
	147.64	189.784	4.05		147.274	189.751	1.5259
	147.75	188.834	0.8		147.524	189.452	1.5208
	148.315	193.212	0.861737		147.774	189.964	1.3302
	148.597	193.245	0.79		148.024	190.828	0.9629
	148.88	195.723	1.5		148.274	192.45	0.8906
	148.908	192.346	1.4		148.524	193.563	0.8187
	149.396	193.567	1.2296		148.774	193.744	0.8558
	149.48	193.092	1.10485		149.024	193.403	0.9038
	149.835	194.714	0.810391		149.274	193.16	1.0769
	150.04	196.457	1.5		149.524	193.249	1.0784
	150.072	197.016	2.3		149.774	194.917	1.083
	150.303	199.095	1.005		150.024	196.562	1.0593
	151.09	196.306	1.86		150.274	197.923	1.078
	151.18	201.481	1		150.524	197.853	1.4098
	151.62	198.234	1.08		150.774	198.114	1.4548
	151.715	195.652	1.71		151.024	198.533	1.4518
	151.953	195.5	0.938084		151.274	198.433	1.1724
	152.17	200.594	2.17		151.524	197.994	0.9446
	152.73	194.804	1.38		151.774	198.034	1.1424
	152.76	191.231	0.995682		152.024	197.738	1.5976
	152.842	193.032	1.1225		152.274	197.111	1.6829
	153.018	192.137	1.40344		152.524	195.981	1.7128
	153.37	192.812	1.73		152.774	194.075	1.2251
	153.396	190.638	1.1		153.024	192.118	1.0831
	153.61	190.659	1.22925		153.274	191.249	1.1777
	153.893	188.907	1.61349		153.524	190.896	1.0853
	154.36	190.269	1.5		153.774	190.267	1.2414
	154.46	187.671	1.6		154.024	189.466	1.2563
	154.931	186.106	1.21138		154.274	188.884	1.2448
	155.034	185.782	0.982091		154.524	188.038	1.1089
	155.63	183.444	1.5		154.774	186.888	1.0799
	155.646	182.767	1.6		155.024	185.571	1.1127
	155.887	183.901	0.969422		155.274	185.089	1.1809
	155.902	183.703	0.905018		155.524	183.973	1.1308
	155.912	183.527	1.03		155.774	182.434	0.9838
	156.029	180.371	1.10201		156.024	181.359	1.0913
	156.348	179.789	1.43625		156.274	180.311	1.2069
	156.731	182.449	0.825542		156.524	179.867	1.0053
	156.742	179.491	0.79		156.774	180.425	0.8738
	157.135	181.746	1.1		157.024	181.094	0.9177
	157.56	182.909	0.822108		157.274	181.833	0.9126
	157.682	183.02	1.02362		157.524	182.759	0.9875
	157.772	183.55	0.844616		157.774	183.325	1.1225
	157.899	182.644	1.19662		158.024	184.533	1.2346
	158.169	185.177	1.44423		158.274	185.302	1.3317
	158.286	185.486	0.825822		158.524	185.459	1.3853
	158.557	187.401	2.70867		158.774	185.966	1.3838
	158.658	185.401	0.907975		159.024	186.454	1.2258
	158.958	184.143	1.35151		159.274	187.481	0.9437
	159.048	186.109	0.992434		159.524	189.812	0.7816
	159.187	188.907	0.926307		159.774	192.273	0.7988
	159.282	188.712	0.971639		160.024	194.268	0.781
	159.629	189.888	0.3		160.274	196.33	0.8096
	159.841	192.54	0.79		160.524	198.546	0.8824
	159.849	193.25	1.10201		160.774	198.724	0.9143
	160.091	195.272	1.15754		161.024	198.078	0.9734
	160.177	193.568	1.03171		161.274	196.68	1.2447
	160.4	201.237	1.38142		161.524	194.777	1.164
	160.418	197.106	0.79		161.774	193.668	1.0753
	160.697	198.277	1.2		162.024	193.111	1.1066
	161.001	200.968	1.20513		162.274	191.202	1.1411
	161.237	194.283	1.11685		162.524	189.951	1.2556
	161.493	195.415	0.936439		162.774	189.139	1.1864
	161.901	192.635	0.923935		163.024	189.99	1.2972
	161.916	193.088	1.6		163.274	192.039	1.464
	162.331	192.781	1.28919		163.524	193.734	1.4622
	162.592	187.496	1.2289		163.774	195.114	1.2746
	162.877	188.812	1.11453		164.024	195.768	1.2648
	163.149	191.748	0.866549		164.274	195.863	1.2117
	163.242	191.736	0.856537		164.524	194.885	1.094
	163.261	191.397	2.9		164.774	193.166	1.0546
	163.619	196.063	1.16271		165.024	191.228	0.844
	163.833	193.882	1.49053		165.274	189.455	0.81
	164.168	196.806	0.792075		165.524	187.53	0.8602
	164.299	196.5	0.88186		165.774	185.979	0.9679
	164.376	195.861	1.48		166.024	184.12	1.1269
	164.388	194.734	0.900803		166.274	183.642	1.5463
	164.51	194.627	0.985545		166.524	182.892	1.468
	164.707	196.177	1.03093		166.774	182.082	1.3676
	164.928	189.067	1.02293		167.024	181.448	1.17
	165.158	190.464	0.79		167.274	181.324	0.9846
	165.167	190.919	0.891213		167.524	181.582	0.9902
	165.566	187.78	0.7		167.774	182.486	1.0488
	165.828	185.174	0.967803		168.024	183.707	1.0307
	166.222	182.841	1.2033		168.274	185.401	0.9803
	166.827	183.833	2.0691		168.524	185.833	0.9054
	166.949	179.433	1.7		168.774	186.641	0.9768
	167.406	181.608	0.846552		169.024	189.006	1.1684
	167.704	183.117	0.79		169.274	192.139	1.2679
	167.722	183.545	1.31922		169.524	195.145	1.1104
	168.016	182.732	0.915759		169.774	197.467	0.9491
	168.413	184.963	0.5		170.024	196.992	0.9105
	168.555	189.138	1.8624		170.274	195.713	0.981
	168.657	187.299	0.882296		170.524	194.944	1.1573
	168.673	184.833	0.79		170.774	193.747	1.31
	168.936	192.392	1.15272		171.024	192.263	1.2461
	169.03	184.736	1.72088		171.274	191.969	1.2138
	169.293	192.269	0.85466		171.524	191.678	1.0845
	169.302	191.792	0.79		171.774	191.447	0.9726
	169.532	198.749	1.59276		172.024	190.358	0.9178
	169.623	197.652	1.3		172.274	187.078	1.0768
	169.83	197.906	1.06601		172.524	184.519	1.4243
	169.985	194.443	0.971833		172.774	185.018	1.5692
	170.026	194.688	0.94		173.024	187.278	1.4541
	170.031	195.809	1.28169		173.274	190.179	1.2316
	170.276	196.338	0.928681		173.524	192.91	1.0428
	170.883	193.969	0.918328		173.774	193.762	1.0739
	171.169	189.547	1.2468		174.024	194.046	0.8316
	171.443	192.211	1.18344		174.274	194.821	0.8021
	171.728	193.968	1.30108		174.524	195.29	0.8921
	171.838	190.62	0.1		174.774	194.338	0.984
	172.225	187.803	1.09477		175.024	192.593	0.9675
	172.469	188.778	0.79		175.274	190.611	0.9359
	172.478	186.202	1.26518		175.524	189.152	0.9476
	172.761	181.625	2.49164		175.774	188.279	0.8289
	173.144	189.184	1.1		176.024	187.967	0.8245
	173.286	193.375	0.996056		176.274	186.99	0.907
	173.397	193.668	1.05914		176.524	185.695	1.0224
	173.819	191.975	1.22312		176.774	184.74	1.0499
	174.068	194.585	0.79		177.024	183.669	1.2458
	174.078	194.824	0.888151		177.274	183.256	1.1935
	174.446	195.755	0.7		177.524	184.242	1.2666
	175.065	192.834	0.80052		177.774	185.117	1.1247
	175.327	189.847	0.81413		178.024	185.44	0.9891
	175.69	187.92	0.6		178.274	185.417	0.9831
	176.072	188.328	0.762973		178.524	184.603	1.0387
	176.277	187.536	1.22		178.774	184.834	1.092
	176.299	187.027	1.23942		179.024	188.79	1.0071
	176.434	186.757	0.906776		179.274	193.093	0.9469
	176.57	185.691	1.26686		179.524	196.892	0.9346
	176.68	182.86	1.1539		179.774	200.233	0.9612
	176.821	183.78	0.919963		180.024	201.866	0.9592
	176.908	184.412	0.79		180.274	202.745	0.9771
	176.917	182.454	0.796512		180.524	204.812	1.0122
	177.048	184.477	1.07835		180.774	206.855	0.9279
	177.141	181.082	1.17325		181.024	207.911	0.888
	177.28	184.796	0.936624		181.274	208.355	0.8217
	177.513	182.274	1.67168		181.524	207.03	0.7577
	177.759	184.641	1.04016		181.774	204.114	0.8307
	178.044	187.648	0.797334		182.024	200.446	1.08
	178.163	186.995	0.2		182.274	198.368	1.1837
	178.437	183.564	0.814144		182.524	196.744	1.1765
	178.759	184.053	0.966653		182.774	196.509	1.2481
	178.864	187.569	0.826904		183.024	196.451	1.3612
	179.124	187.91	0.801261		183.274	196.134	1.4127
	179.485	200.474	1.1		183.524	195.713	1.1476
	179.734	198.034	0.890212		183.774	193.751	1.003
	179.832	197.366	1.21945		184.024	192.666	1.0227
	179.962	202.225	0.789189		184.274	192.823	0.9245
	180.049	201.319	1.04995		184.524	192.899	0.9255
	180.24	204.934	1.346		184.774	193.611	1.0175
	180.548	203.461	0.3		185.024	195.405	1.0358
	180.736	204.835	0.79		185.274	193.768	1.1645
	180.743	205.445	0.938794		185.524	193.006	1.2343
	181.048	208.532	1.50061		185.774	192.725	1.0891
	181.265	211.711	0.817349		186.024	193.182	1.0324
	181.271	210.856	0.95		186.274	194.825	1.0075
	181.326	207.555	1.2916		186.524	197.725	1.0045
	181.56	205.026	0.4		186.774	199.268	1.0949
	181.92	203.19	0.916284		187.024	201.071	1.2792
	182.173	199.32	1.26477		187.274	202.41	1.3108
	182.451	195.224	0.90476		187.524	203.54	1.3782
	182.715	196.936	0.801053		187.774	204.15	1.6512
	183.359	196.91	1.95009		188.024	206.812	1.5334
	183.462	193.928	0.99425		188.274	210.009	1.2759
	183.821	194.834	0.924834		188.524	216.719	1.0264
	184.05	194.31	0.9		188.774	217.526	1.001
	184.286	188.776	1.44442		189.024	213.663	1.0011
	184.495	195.479	0.7
	184.567	193.076	1.14803
	184.65	193.554	0.79
	184.928	196.221	2.75068
	185.037	193.62	0.874106
	185.419	195.052	0.978829
	185.516	195.055	0.957717
	185.793	189.152	0.763223
	186.106	196.17	1.27259
	186.403	194.235	0.4
	186.509	197.564	1.21888
	186.604	197.892	0.87294
	186.881	200.493	0.91352
	188.237	207.069	1.66496
	188.491	215.471	0.903138
	188.5	217.31	1.37
	188.599	215.949	1.07598
	188.749	216.982	0.814254
	188.949	220.03	0.955309
	189.037	222.877	0.824254

## Sheet: CO2
	CO2 data from Dome C using Ball mill at IGE [this study]					CO2 data from Dome C using CIM at Univ.Bern [this study]						CO2 data from Dome C using Needle cracker at Univ.Bern in 2003					CO2 data from Dome C using Sublimation at Univ.Bern [Schneider et al. (2013)]					CO2 data from Dome C using ball mill at IGE [Lourantou et al. (2010b)]
	Depth [m]	Age in this study [kyr BP]	CO2 [ppm]	CO2 error (1sigma) [ppm]		Depth [m]	Age in this study [kyr BP]	CO2 [ppm]	CO2 error (1sigma) [ppm]	# of Replicates		Depth [m]	Age in this study [kyr BP]	CO2 [ppm]	CO2 error (1sigma) [ppm]		Depth [m]	Age in this study [kyr BP]	CO2 [ppm]	CO2 error (1sigma) [ppm]		Depth [m]	Age in this study [kyr BP]	CO2 [ppm]	CO2 error (1sigma) [ppm]
	1787.63	135.274	198.332	1.22513		1785.23	135.04	207.618	0.17	2		1793.52	136.317	208.126	1.04289		1799.45	137.428	197.918	NAN		1669.25	124.859	277.64	0.12
	1791.62	135.962	196.798	0.954368		1788.67	135.453	204.708	0.09	2		1799.59	137.453	200.685	0.4109		1804.63	138.464	197.292	1.08		1674.75	125.326	275.61	0.83
	1801.69	137.845	192.452	1.32695		1794.58	136.515	199.946	0.54	2		1805.07	138.556	197.528	1.56016		1809.58	139.506	191.551	0.19		1674.75	125.326	278.5	2.25
	1812.47	140.113	185.242	0.954896		1797.73	137.104	199.319	0.34	2		1810.04	139.601	195.032	0.433424		1820.67	141.918	195.252	0.95		1677.5	125.561	271.68	1.26
	1815.13	140.649	184.815	1.16008		1807.23	139.01	194.548	0.5	2		1821.01	141.995	199.255	0.692088		1826.38	143.219	193.347	NAN		1680.25	125.808	272.59	1.19
	1815.52	140.737	186.455	0.888032		1814.04	140.43	191.735	1.04	3		1826.58	143.261	197.252	0.208446		1831.72	144.333	194.745	NAN		1685.75	126.306	273.47	2.37
	1817.88	141.27	186.169	1.20886		1821.67	142.147	199.774	2.06	4		1832.08	144.401	195.798	0.562858		1837.39	145.416	192.289	0.64		1691.25	126.739	267.19	2.59
	1819.98	141.76	195.447	0.836304		1852.54	148.597	198.613	0.61	3		1837.58	145.451	194.49	1.0734		1848.03	147.642	194.494	4.05		1696.75	127.078	271.56	1.23
	1823.77	142.628	188.019	0.770072		1867.73	151.715	201.02	1.71	2		1848.54	147.75	196.668	0.799808		1853.91	148.882	200.433	NAN		1702.25	127.503	274.81	1.55
	1825.48	143.012	191.868	0.877027		1888.22	155.912	188.895	1.03	4		1854.04	148.908	200.18	1.36457		1859.38	150.039	201.167	NAN		1705	127.66	277.27	3.61
	1827.62	143.499	190.914	0.80198		1890.97	156.742	184.859	0.48	2		1859.54	150.072	204.85	2.30076		1864.56	151.086	201.016	1.86		1707.75	127.829	287.48	5.72
	1828.88	143.773	189.872	0.968507		1904.58	159.841	197.908	0.43	2		1865.04	151.18	209.314	1.02409		1875.89	153.368	197.521	1.73		1713.25	128.173	290.23	-6.843
	1829.19	143.832	187.826	0.780523		1907.54	160.418	202.473	0.52	2		1876.04	153.396	198.472	1.05059		1881.07	154.365	194.979	NAN		1718.75	128.507	290.49	1.43
	1833.12	144.608	191.353	1.41723		1925.46	164.376	201.229	1.48	4		1881.54	154.46	195.504	1.6456		1886.95	155.627	188.154	NAN		1724.25	128.878	269.37	1.34
	1834.77	144.915	192.027	1.30363		1929.33	165.158	195.831	0.24	2		1887.04	155.646	190.601	1.58329							1729.75	129.254	264.77	3.28
	1836.48	145.242	192.486	0.81459		1939.21	167.704	188.485	0.68	3		1892.54	157.135	189.58	1.12426							1732.5	129.437	262.02	1.7
	1838.62	145.651	187.984	1.23354		1943.14	168.673	190.201	0.48	2		1903.54	159.629	197.722	0.262272							1735.25	129.659	263.41	1.02
	1841.37	146.222	192.248	3.17188		1945.97	169.302	197.159	0.75	2		1909.04	160.697	206.11	1.16069							1740.75	130.033	261.69	3.3
	1845.77	147.16	189.932	1.028		1950.23	170.026	200.056	0.94	2		1914.54	161.916	200.922	1.61602							1744.05	130.249	256.15	1.83
	1851.18	148.315	193.212	0.861737		1961.23	172.469	194.145	0.19	2		1920.04	163.261	199.231	2.93378							1749.55	130.678	250.59	2.83
	1856.38	149.396	193.567	1.2296		1967.83	174.068	199.952	0.15	2		1931.04	165.566	195.614	0.704854							1755.05	131.152	243.17	1.63
	1856.77	149.48	193.092	1.10485		1977.63	176.277	192.904	1.22	4		1936.53	166.949	187.267	1.68005							1760	131.695	237.9	1.63
	1858.42	149.835	194.714	0.810391		1980.48	176.908	189.78	0.78	2		1942.04	168.413	192.797	0.521802							1766.05	132.425	231.29	0.21
	1860.62	150.303	199.095	1.005		1998.08	180.736	210.203	0.16	2		1947.54	169.623	205.486	1.25757							1771.55	133.072	225.26	1.07
	1868.93	151.953	195.5	0.938084		2000.97	181.271	216.224	0.95	2		1958.54	171.838	198.454	0.0723978							1773.75	133.358	221.53	1.46
	1872.88	152.76	191.231	0.995682		2016.23	184.65	198.922	0.59	2		1964.04	173.144	197.018	1.1038							1779.25	134.074	210.48	2.41
	1873.27	152.842	193.032	1.1225		2033.97	188.5	222.677	1.37	2		1969.54	174.446	203.589	0.704413							1784.75	134.971	205.67	0.77
	1874.12	153.018	192.137	1.40344								1975.04	175.69	195.754	0.609988							1787.5	135.387	204.27	1.82
	1877.12	153.61	190.659	1.22925								1986.04	178.163	194.828	0.248711							1790.25	135.726	199.63	2.36
	1878.77	153.893	188.907	1.61349								1991.54	179.485	208.308	1.07095							1790.25	135.726	199.03	0.83
	1883.83	154.931	186.106	1.21138								1997.04	180.548	211.294	0.301277							1795.75	136.734	193.45	1.14
	1884.27	155.034	185.782	0.982091								2002.53	181.56	212.86	0.353584							1801.25	137.763	196.78	1.99
	1888.12	155.887	183.901	0.969422								2013.54	184.05	202.144	0.894741							1806.75	138.91	191.09	2.09
	1888.18	155.902	183.703	0.905018								2015.55	184.495	203.313	0.72133							1812.25	140.067	186.38	1.66
	1888.67	156.029	180.371	1.10201								2024.54	186.403	202.069	0.366477							1815	140.624	184.07	4.12
	1889.77	156.348	179.789	1.43625																		1821.05	142.005	193.07	1.83
	1890.93	156.731	182.449	0.825542																		1867.25	151.62	200.6	1.08
	1894.23	157.56	182.909	0.822108																		1870	152.172	202.96	2.17
	1894.83	157.682	183.02	1.02362																		1872.75	152.734	197.17	1.38
	1895.27	157.772	183.55	0.844616
	1895.82	157.899	182.644	1.19662
	1896.98	158.169	185.177	1.44424
	1897.47	158.286	185.486	0.825822
	1898.63	158.557	187.401	2.70867
	1899.07	158.658	185.401	0.907975
	1900.38	158.958	184.143	1.35151
	1900.77	159.048	186.109	0.992434
	1901.38	159.187	188.907	0.926307
	1901.82	159.282	188.712	0.971639
	1904.62	159.849	193.25	1.10201
	1905.83	160.091	195.272	1.15754
	1906.27	160.177	193.568	1.03171
	1907.44	160.4	201.237	1.38142
	1910.67	161.001	200.968	1.20513
	1911.77	161.237	194.283	1.11685
	1912.87	161.493	195.415	0.936439
	1914.47	161.901	192.635	0.923935
	1916.23	162.331	192.781	1.28919
	1917.27	162.592	187.496	1.2289
	1918.36	162.877	188.812	1.11453
	1919.53	163.149	191.748	0.866549
	1919.94	163.242	191.736	0.856537
	1921.73	163.619	196.063	1.16271
	1922.77	163.833	193.882	1.49053
	1924.42	164.168	196.806	0.792075
	1925.08	164.299	196.5	0.88186
	1925.52	164.388	194.734	0.900803
	1926.13	164.51	194.627	0.985545
	1927.23	164.707	196.177	1.03093
	1928.27	164.928	189.067	1.02293
	1929.37	165.167	190.919	0.891213
	1932.12	165.828	185.174	0.967803
	1933.77	166.222	182.841	1.2033
	1936.09	166.827	183.833	2.0691
	1938.17	167.406	181.608	0.846552
	1939.27	167.722	183.545	1.31922
	1940.37	168.016	182.732	0.915759
	1942.63	168.555	189.138	1.8624
	1943.07	168.657	187.299	0.882296
	1944.33	168.936	192.392	1.15272
	1944.77	169.03	184.736	1.72088
	1945.93	169.293	192.269	0.85466
	1947.06	169.532	198.749	1.59276
	1948.62	169.83	197.906	1.06601
	1949.83	169.985	194.443	0.971833
	1950.27	170.031	195.809	1.28169
	1951.98	170.276	196.338	0.928681
	1954.67	170.883	193.969	0.918328
	1955.77	171.169	189.547	1.2468
	1956.87	171.443	192.211	1.18344
	1958.07	171.728	193.968	1.30108
	1960.17	172.225	187.803	1.09477
	1961.27	172.478	186.202	1.26518
	1962.44	172.761	181.625	2.49164
	1964.63	173.286	193.375	0.996056
	1965.07	173.397	193.668	1.05914
	1966.77	173.819	191.975	1.22312
	1967.87	174.078	194.824	0.888151
	1972.33	175.065	192.834	0.80052
	1973.44	175.327	189.847	0.81413
	1976.73	176.072	188.328	0.762973
	1977.72	176.299	187.027	1.23942
	1978.32	176.434	186.757	0.906776
	1978.93	176.57	185.691	1.26686
	1979.42	176.68	182.86	1.1539
	1980.08	176.821	183.78	0.919963
	1980.52	176.917	182.454	0.796512
	1981.13	177.048	184.477	1.07835
	1981.57	177.141	181.082	1.17325
	1982.23	177.28	184.796	0.936624
	1983.27	177.513	182.274	1.67168
	1984.37	177.759	184.641	1.04016
	1985.56	178.044	187.648	0.797334
	1987.13	178.437	183.564	0.814144
	1988.38	178.759	184.053	0.966653
	1988.77	178.864	187.569	0.826904
	1989.87	179.124	187.91	0.801261
	1992.68	179.734	198.034	0.890212
	1993.17	179.832	197.366	1.21945
	1993.83	179.962	202.225	0.789189
	1994.27	180.049	201.319	1.04996
	1995.32	180.24	204.934	1.346
	1998.12	180.743	205.445	0.938794
	1999.77	181.048	208.532	1.50061
	2000.93	181.265	211.711	0.817349
	2001.42	181.326	207.555	1.2916
	2004.23	181.92	203.19	0.916284
	2005.27	182.173	199.32	1.26477
	2006.37	182.451	195.224	0.90476
	2007.47	182.715	196.936	0.801053
	2010.33	183.359	196.91	1.9501
	2010.77	183.462	193.928	0.99425
	2012.48	183.821	194.834	0.924834
	2014.62	184.286	188.776	1.44442
	2015.87	184.567	193.076	1.14802
	2017.44	184.928	196.221	2.75068
	2017.91	185.037	193.62	0.874106
	2019.63	185.419	195.052	0.978829
	2020.07	185.516	195.055	0.957717
	2021.33	185.793	189.152	0.763223
	2022.87	186.106	196.17	1.27259
	2025.13	186.509	197.564	1.21888
	2025.57	186.604	197.892	0.87294
	2026.78	186.881	200.493	0.91352
	2032.77	188.237	207.069	1.66496
	2033.93	188.491	215.471	0.903138
	2034.42	188.599	215.949	1.07598
	2035.13	188.749	216.982	0.814254
	2036.13	188.949	220.03	0.955309
	2036.57	189.037	222.877	0.824254

## Sheet: CH4
	Depth [m]	New age in this study [ka]	CH4 [ppb]	CH4 error (1sigma) [ppb]	Reference
	1787.5	135.364	404	10	Loulergue et al., 2007
	1787.97	135.476	379.706	8.33373	This study
	1790.3	135.901	382	10	Loulergue et al., 2007
	1791.82	136.21	402.754	5.96576	This study
	1793.4	136.53	409	10	Loulergue et al., 2007
	1795.7	136.992	375	10	Loulergue et al., 2007
	1799.5	137.705	395	10	Loulergue et al., 2007
	1801.2	138.037	395	10	Loulergue et al., 2007
	1801.63	138.12	396.304	5.13008	This study
	1804.5	138.683	406	10	Loulergue et al., 2007
	1806.7	139.2	368	10	Loulergue et al., 2007
	1808.27	139.545	372.544	10.0192	This study
	1809.5	139.822	432	10	Loulergue et al., 2007
	1812.2	140.399	358	10	Loulergue et al., 2007
	1815	140.994	342	10	Loulergue et al., 2007
	1815.47	141.1	353.389	11.2291	This study
	1817.7	141.609	349	10	Loulergue et al., 2007
	1818.22	141.73	334.633	9.86795	This study
	1820.5	142.241	359	10	Loulergue et al., 2007
	1823.2	142.869	368	11	Loulergue et al., 2007
	1823.72	142.981	335.524	7.11016	This study
	1826.4	143.58	375	10	Loulergue et al., 2007
	1828.7	144.088	385	10	Loulergue et al., 2007
	1829.13	144.178	356.285	8.11152	This study
	1831.5	144.646	401	10	Loulergue et al., 2007
	1834.3	145.174	401	10	Loulergue et al., 2007
	1834.72	145.254	413.857	13.8414	This study
	1837	145.687	375	10	Loulergue et al., 2007
	1838.57	145.98	380.138	6.86025	This study
	1839.7	146.202	391	10	Loulergue et al., 2007
	1841.32	146.555	396.883	1.27112	This study
	1843	146.916	402	10	Loulergue et al., 2007
	1845.2	147.353	410	10	Loulergue et al., 2007
	1845.72	147.46	381.67	9.44061	This study
	1848.4	148.028	421	10	Loulergue et al., 2007
	1850.7	148.529	423	10	Loulergue et al., 2007
	1851.13	148.62	424.713	12.2115	This study
	1853.5	149.103	471	10	Loulergue et al., 2007
	1855.07	149.429	453.931	1.16535	This study
	1856.3	149.692	428	10	Loulergue et al., 2007
	1856.72	149.781	427.674	9.05746	This study
	1859.4	150.345	433	10	Loulergue et al., 2007
	1860.57	150.574	426.918	6.07234	This study
	1861.7	150.791	441	10	Loulergue et al., 2007
	1863.27	151.092	418.684	7.99782	This study
	1864.5	151.336	404	10	Loulergue et al., 2007
	1867.3	151.9	400	10	Loulergue et al., 2007
	1868.98	152.232	420.401	5.85646	This study
	1870	152.435	432	10	Loulergue et al., 2007
	1872.8	153.014	422	10	Loulergue et al., 2007
	1873.22	153.101	423.456	11.3975	This study
	1875.9	153.646	426	10	Loulergue et al., 2007
	1877.07	153.865	429.245	7.85949	This study
	1878.2	154.054	413	10	Loulergue et al., 2007
	1878.68	154.142	410.884	15.4089	This study
	1881	154.574	402	10	Loulergue et al., 2007
	1883.7	155.194	403	10	Loulergue et al., 2007
	1884.22	155.309	412.751	9.26703	This study
	1886.5	155.833	393	10	Loulergue et al., 2007
	1889.2	156.51	385	10	Loulergue et al., 2007
	1889.72	156.663	371.621	7.57779	This study
	1892	157.413	407	10	Loulergue et al., 2007
	1894.7	158.02	399	10	Loulergue et al., 2007
	1895.22	158.125	384.836	8.09044	This study
	1897.5	158.67	422	0.3	Loulergue et al., 2007
	1899.12	159.051	404.509	10.0823	This study
	1900.3	159.319	400	10	Loulergue et al., 2007
	1901.43	159.55	435.826	13.2864	This study
	1901.87	159.638	421.154	1.75708	This study
	1903	159.867	410	10	Loulergue et al., 2007
	1905.7	160.373	407	10	Loulergue et al., 2007
	1906.22	160.466	414.189	4.69013	This study
	1908.5	160.88	440	10	Loulergue et al., 2007
	1911.2	161.38	407	10	Loulergue et al., 2007
	1911.72	161.486	413.881	14.8983	This study
	1914	162.046	415	10	Loulergue et al., 2007
	1916.7	162.717	410	10	Loulergue et al., 2007
	1917.22	162.852	429.01	14.037	This study
	1918.27	163.12	443.177	12.2326	This study
	1919.9	163.496	424	10	Loulergue et al., 2007
	1922.2	163.986	413	10	Loulergue et al., 2007
	1922.72	164.092	403.962	11.1718	This study
	1925	164.556	442	10	Loulergue et al., 2007
	1927.7	165.082	411	10	Loulergue et al., 2007
	1928.22	165.191	426.049	12.16	This study
	1930.5	165.696	417	10	Loulergue et al., 2007
	1932.07	166.099	405.066	11.2578	This study
	1933.3	166.398	393	10	Loulergue et al., 2007
	1934.98	166.843	391.326	6.92214	This study
	1936	167.116	384	10	Loulergue et al., 2007
	1938.7	167.903	424	10	Loulergue et al., 2007
	1940.32	168.353	437.777	6.49005	This study
	1941.5	168.649	433	10	Loulergue et al., 2007
	1944.2	169.258	449	10	Loulergue et al., 2007
	1947	169.861	479	10	Loulergue et al., 2007
	1948.57	170.14	494.245	13.749	This study
	1949.7	170.282	495	10	Loulergue et al., 2007
	1950.22	170.334	471.356	15.8723	This study
	1952.5	170.681	496	10	Loulergue et al., 2007
	1953.68	170.938	494.716	7.70302	This study
	1955.2	171.298	445	10	Loulergue et al., 2007
	1956.82	171.697	438.312	4.39991	This study
	1958	171.983	478	10	Loulergue et al., 2007
	1960.7	172.637	442	10	Loulergue et al., 2007
	1963.5	173.327	448	10	Loulergue et al., 2007
	1966.2	174.008	484	10	Loulergue et al., 2007
	1966.72	174.128	478.76	9.4289	This study
	1969	174.602	480	10	Loulergue et al., 2007
	1970.57	174.953	497.98	9.88864	This study
	1974.5	175.854	433	10	Loulergue et al., 2007
	1976.07	176.199	435.135	7.36871	This study
	1977.7	176.576	456	10	Loulergue et al., 2007
	1978.98	176.863	465.452	10.349	This study
	1980	177.087	427	10	Loulergue et al., 2007
	1981.18	177.349	445.072	3.65389	This study
	1981.62	177.447	439.027	12.8862	This study
	1982.7	177.68	457	10	Loulergue et al., 2007
	1984.32	178.05	466.178	9.32963	This study
	1985.5	178.332	471	10	Loulergue et al., 2007
	1988.2	179.043	466	10	Loulergue et al., 2007
	1988.72	179.178	482.924	13.2774	This study
	1991	179.692	499	10	Loulergue et al., 2007
	1993.7	180.217	547	10	Loulergue et al., 2007
	1994.93	180.449	561.955	12.8075	This study
	1995.37	180.533	579.962	10.3135	This study
	1995.48	180.554	499.017	12.807	This study
	1996.5	180.73	550	10	Loulergue et al., 2007
	1999.2	181.172	542	11	Loulergue et al., 2007
	1999.72	181.262	571.579	14.7753	This study
	2002.4	181.722	479	10	Loulergue et al., 2007
	2004.7	182.241	483	10	Loulergue et al., 2007
	2007.5	182.932	452	10	Loulergue et al., 2007
	2008.68	183.21	475.822	7.19098	This study
	2010.2	183.578	490	10	Loulergue et al., 2007
	2013.5	184.317	496	10	Loulergue et al., 2007
	2014.57	184.562	510.17	5.39327	This study
	2015.7	184.823	496	10	Loulergue et al., 2007
	2017.53	185.245	538.385	9.65084	This study
	2018.5	185.462	528	10	Loulergue et al., 2007
	2019.68	185.733	524.806	1.34992	This study
	2020.12	185.831	534.462	11.3635	This study
	2021.2	186.073	530	10	Loulergue et al., 2007
	2022.82	186.417	535.743	7.6778	This study
	2024.5	186.724	532	10	Loulergue et al., 2007
	2026.7	187.203	514	10	Loulergue et al., 2007
	2027.19	187.315	537.542	11.1358	This study
	2029.5	187.827	476	10	Loulergue et al., 2007
	2031.07	188.175	435.375	8.95374	This study
	2032.2	188.425	459	10	Loulergue et al., 2007
	2032.72	188.536	440.024	9.81934	This study
	2035	189.004	447	10	Loulergue et al., 2007
	2035.47	189.097	446.611	3.94807	This study
	2038.12	189.609	420.07	4.30554	This study
	2038.2	189.624	437	10	Loulergue et al., 2007
	2040.5	190.027	446	10	Loulergue et al., 2007

## Sheet: d15N
	Depth [m]	δ15N of N2 [per mil]	δ15N error (1sigma) [per mil]	Reference
	1782.02	0.447326		Landais et al., 2013
	1784.77	0.449928		Landais et al., 2013
	1784.84	0.456333		Landais et al., 2013
	1787.52	0.448136		Landais et al., 2013
	1787.58	0.4355		Landais et al., 2013
	1790.42	0.445		Landais et al., 2013
	1793.02	0.419648		Landais et al., 2013
	1795.83	0.4215		Landais et al., 2013
	1801.33	0.4205		Landais et al., 2013
	1804.57	0.421		Landais et al., 2013
	1806.83	0.427		Landais et al., 2013
	1809.52	0.413016		Landais et al., 2013
	1812.41	0.425		Landais et al., 2013
	1815.08	0.4255		Landais et al., 2013
	1817.77	0.427841		Landais et al., 2013
	1817.83	0.426		Landais et al., 2013
	1823.33	0.4245		Landais et al., 2013
	1828.83	0.4245		Landais et al., 2013
	1834.38	0.4395		Landais et al., 2013
	1839.77	0.452191		Landais et al., 2013
	1845.33	0.448		Landais et al., 2013
	1867.27	0.43677		Landais et al., 2013
	1870.02	0.43737		Landais et al., 2013
	1874.98	0.420341	0.00941784	this study
	1876.63	0.421014	0.00567709	this study
	1877.73	0.442521		this study
	1879.93	0.44309		this study
	1880.48	0.457		this study
	1882.13	0.429641	0.010407	this study
	1884.88	0.457385		this study
	1886.03	0.427182		this study
	1887.63	0.432624	0.0107822	this study
	1888.73	0.443685		this study
	1889.83	0.446213		this study
	1891.04	0.401644		this study
	1891.48	0.392208		this study
	1893.13	0.414997	0.00513742	this study
	1894.28	0.416752		this study
	1895.33	0.418		this study
	1901.49	0.407483		this study
	1902.48	0.401973		this study
	1904.13	0.411348	0.0077548	this study
	1909.63	0.408939	0.015872	this study
	1910.18	0.427375		this study
	1912.38	0.421404	0.00932851	this study
	1913.48	0.41628	0.00508301	this study
	1915.13	0.410826		this study
	1916.28	0.3985		this study
	1917.33	0.418681		this study
	1918.98	0.396005	0.0113208	this study
	1921.78	0.375809		this study
	1923.93	0.376		this study
	1926.18	0.393267	0.00516227	this study
	1927.28	0.386191		this study
	1928.33	0.384		this study
	1929.98	0.400648	0.00615525	this study
	1931.63	0.385482		this study
	1933.83	0.398304	0.00522635	this study
	1937.13	0.376082		this study
	1937.68	0.391379	0.00794973	this study
	1939.88	0.355492		this study
	1940.98	0.369737	0.00705886	this study
	1942.74	0.363105	0.00980006	this study
	1944.83	0.388371		this study
	1946.48	0.369861	0.00878741	this study
	1948.13	0.371373		this study
	1949.23	0.390364	0.00524783	this study
	1950.33	0.409		this study
	1950.88	0.407178	0.0139319	this study
	1952.03	0.420057		this study
	1954.18	0.430482		this study
	1956.38	0.399719		this study
	1959.13	0.40653		this study
	1967.38	0.418935		this study
	1968.48	0.41026		this study
	1970.13	0.405602	0.0164075	this study
	1971.23	0.422296		this study
	1973.98	0.397019	0.00911911	this study
	1975.63	0.421		this study
	1976.78	0.400427		this study
	1977.83	0.415988		this study
	1980.03	0.421019		this study
	1982.28	0.420579	0.0101672	this study
	1983.33	0.420093	0.0125968	this study
	1984.98	0.434822		this study
	1986.63	0.415473		this study
	1989.38	0.416332	0.00925648	this study
	1990.48	0.406756		this study
	1995.98	0.427217		this study
	1997.63	0.426949		this study
	1998.73	0.4405		this study
	2001.04	0.429068		this study
	2001.48	0.441201		this study
	2003.13	0.4535		this study
	2004.28	0.438929		this study
	2005.33	0.420871	0.0104281	this study
	2006.98	0.444		this study
	2009.18	0.422141	0.00846274	this study
	2011.38	0.406166		this study
	2012.53	0.426		this study
	2014.13	0.404296	0.00890423	this study
	2019.74	0.440093		this study
	2022.38	0.388026		this study
	2023.48	0.407863		this study
	2025.24	0.43817		this study
	2089.04	0.447885	0.00549408	this study
	2091.79	0.448588	0.00539818	this study
	2102.79	0.462825		this study
	2113.28	0.439321		this study
	2118.74	0.451215	0.00664434	this study
	2124.24	0.436		this study

## Sheet: Revised gas age
	Depth [m]	Revised gas age [ka]	Relative age uncertainty between air and ice (1 sigma) [ka]	Revised gas age uncertainty (1sigma) [ka]
	1773.83	133.249	0.792108	2.29384
	1776.52	133.577	0.805395	2.31561
	1779.37	133.987	0.815789	2.35965
	1782.02	134.376	0.848335	2.43785
	1784.77	134.804	0.871747	2.54774
	1784.84	134.811	0.873377	2.54965
	1787.52	135.227	0.902733	2.57713
	1787.58	135.266	0.895798	2.57746
	1790.42	135.741	0.898168	2.65553
	1793.02	136.239	0.904677	2.68774
	1795.83	136.765	0.903015	2.69597
	1801.33	137.78	0.896908	2.76926
	1804.57	138.381	0.902792	2.87714
	1806.83	138.911	0.890286	2.8849
	1809.52	139.487	0.88129	2.90518
	1812.41	140.102	0.874719	2.90151
	1815.08	140.639	0.868887	2.94222
	1817.77	141.24	0.871002	2.92561
	1817.83	141.258	0.870084	2.92425
	1823.33	142.523	0.829876	2.90411
	1828.83	143.763	0.827232	2.9514
	1834.38	144.841	0.844751	3.00217
	1839.77	145.865	0.842061	3.1529
	1845.33	147.073	0.812998	3.22368
	1867.27	151.613	0.920822	3.82138
	1870.02	152.177	0.934958	3.85817
	1876.63	153.527	0.950456	3.9492
	1877.73	153.71	0.949955	3.98136
	1879.93	154.096	0.923437	3.95543
	1880.48	154.178	0.921178	3.9645
	1882.13	154.559	0.888523	3.97121
	1884.88	155.171	0.828626	3.9177
	1886.03	155.432	0.802021	3.88992
	1887.63	155.76	0.794296	3.84964
	1888.73	156.043	0.789608	3.81535
	1889.83	156.364	0.775367	3.78768
	1891.04	156.767	0.761032	3.79397
	1891.48	156.939	0.751728	3.80762
	1893.13	157.315	0.779445	3.8048
	1894.28	157.572	0.801785	3.80009
	1895.33	157.783	0.82449	3.79617
	1901.49	159.212	0.816455	3.7096
	1902.48	159.408	0.803689	3.68674
	1904.13	159.745	0.779058	3.62676
	1909.63	160.816	0.80918	3.57158
	1910.18	160.895	0.827054	3.58072
	1912.38	161.367	0.880519	3.61126
	1913.48	161.656	0.890729	3.62429
	1915.13	162.062	0.909265	3.63889
	1916.28	162.345	0.914109	3.61007
	1917.33	162.606	0.916866	3.55727
	1918.98	163.027	0.903014	3.44909
	1921.78	163.63	0.886658	3.38381
	1923.93	164.071	0.882263	3.35087
	1926.18	164.521	0.860057	3.32566
	1927.28	164.717	0.854023	3.30392
	1928.33	164.94	0.847625	3.28293
	1929.98	165.301	0.821789	3.24887
	1931.63	165.707	0.792829	3.18282
	1933.83	166.235	0.788881	3.09085
	1937.13	167.095	0.778915	3.08763
	1937.68	167.266	0.77757	3.09631
	1939.88	167.897	0.779998	3.10637
	1940.98	168.156	0.795534	3.11312
	1942.74	168.582	0.82051	3.13056
	1944.83	169.042	0.858076	3.17469
	1946.48	169.415	0.872666	3.2196
	1948.13	169.754	0.862309	3.17933
	1949.23	169.922	0.857901	3.13608
	1950.33	170.036	0.865189	3.12199
	1950.88	170.069	0.875892	3.12082
	1952.03	170.286	0.863128	3.09126
	1954.18	170.753	0.845658	3.08964
	1956.38	171.325	0.853949	3.13143
	1959.13	171.987	0.893175	3.22953
	1967.38	173.966	0.868924	2.9563
	1968.48	174.196	0.876779	2.93174
	1970.13	174.584	0.871574	2.95781
	1971.23	174.821	0.869698	3.00861
	1973.98	175.456	0.827159	2.99058
	1975.63	175.816	0.791568	2.91477
	1976.78	176.085	0.76421	2.84468
	1977.83	176.324	0.738595	2.78092
	1980.03	176.81	0.714724	2.68032
	1982.28	177.291	0.723755	2.61709
	1983.33	177.524	0.730202	2.6019
	1984.98	177.895	0.756913	2.62595
	1986.63	178.316	0.77871	2.70142
	1989.38	179.022	0.801452	2.77919
	1990.48	179.249	0.82336	2.76927
	1995.98	180.362	0.84639	2.70612
	1997.63	180.651	0.866125	2.7046
	1998.73	180.856	0.861417	2.71078
	2001.04	181.287	0.864828	2.75772
	2001.48	181.332	0.876723	2.76929
	2003.13	181.68	0.874301	2.81872
	2004.28	181.933	0.871767	2.83001
	2005.33	182.186	0.864335	2.80472
	2006.98	182.603	0.86383	2.76788
	2009.18	183.101	0.858691	2.80246
	2011.38	183.602	0.847722	2.79021
	2012.53	183.832	0.849555	2.78155
	2014.13	184.177	0.838683	2.77911
	2019.74	185.444	0.749438	2.69638
	2022.38	186.024	0.692356	2.62873
	2023.48	186.207	0.692513	2.61168
	2025.24	186.529	0.697251	2.5901
	2089.04	199.546	0.644313	2.06833
	2091.79	200.007	0.651674	2.07768
