# Supplementary material for: Millennial-scale atmospheric CO 2 variations during the Marine Isotope Stage 6 period (190–135 ka)
Source: Copernicus journal article supplement (doi:10.5194/cp-16-2203-2020), 2020-11-14
Supplement: Supplementary file 1 [file cp-16-2203-2020-supplement.zip › cp-16-2203-2020-supplement-title-page.pdf]

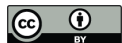

## *Supplement of*

# **Millennial-scale atmospheric CO<sub>2</sub> variations during the Marine Isotope Stage 6 period (190–135 ka)**

**Jinhwa Shin et al.**

*Correspondence to:* Jérôme Chappellaz ([jerome.chappellaz@univ-grenoble-alpes.fr](mailto:jerome.chappellaz@univ-grenoble-alpes.fr))

- [cp-16-2203-2020-supplement-title-page.pdf](#)
- [CO2, CH4 and d15N during the MIS 6 Shin et al., 2020.xlsx](#)
- [Supplement.pdf](#)

The copyright of individual parts of the supplement might differ from the CC BY 4.0 License.
