# Supplementary material for: Millennial-scale atmospheric CO 2 variations during the Marine Isotope Stage 6 period (190–135 ka)
Source: Copernicus journal article supplement (doi:10.5194/cp-16-2203-2020), 2020-11-14
Supplement: Supplementary file 1 [file cp-16-2203-2020-supplement.zip › Supplement.pdf]

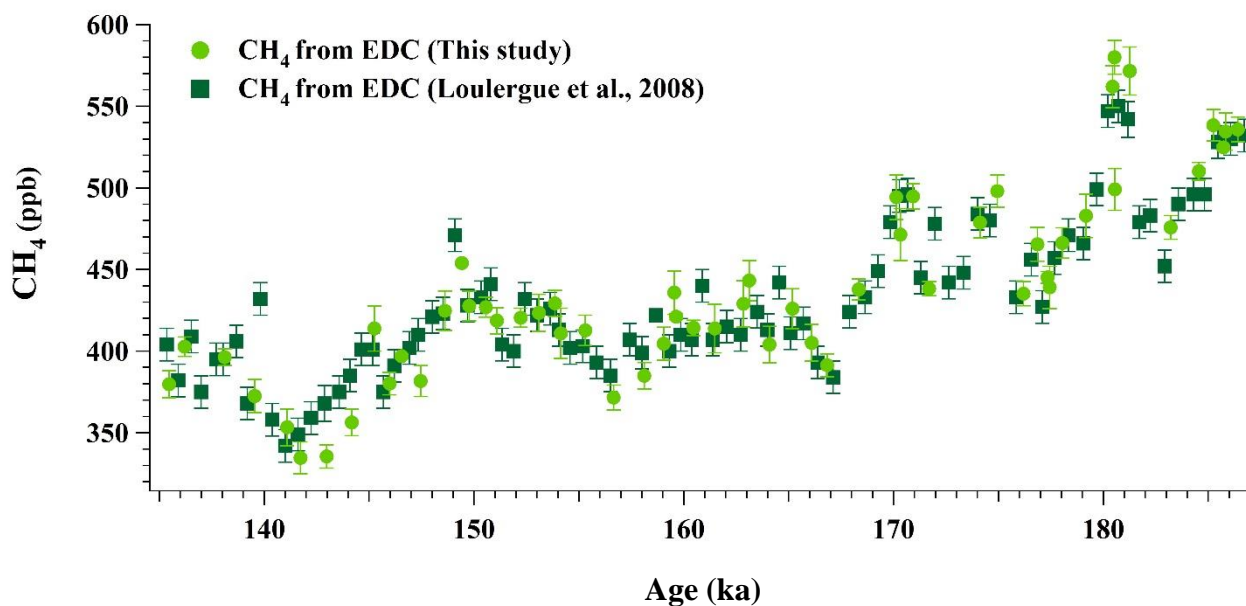

**Figure S1.** Atmospheric  $\text{CH}_4$  concentrations derived from the EPICA Dome C (EDC) ice core covering Marine Isotope Stage (MIS) 6. Dark green squares: published  $\text{CH}_4$  data (Louergue et al., 2008). Light green dots: new  $\text{CH}_4$  data (this study). Both data are on the AICC2012 chronology.

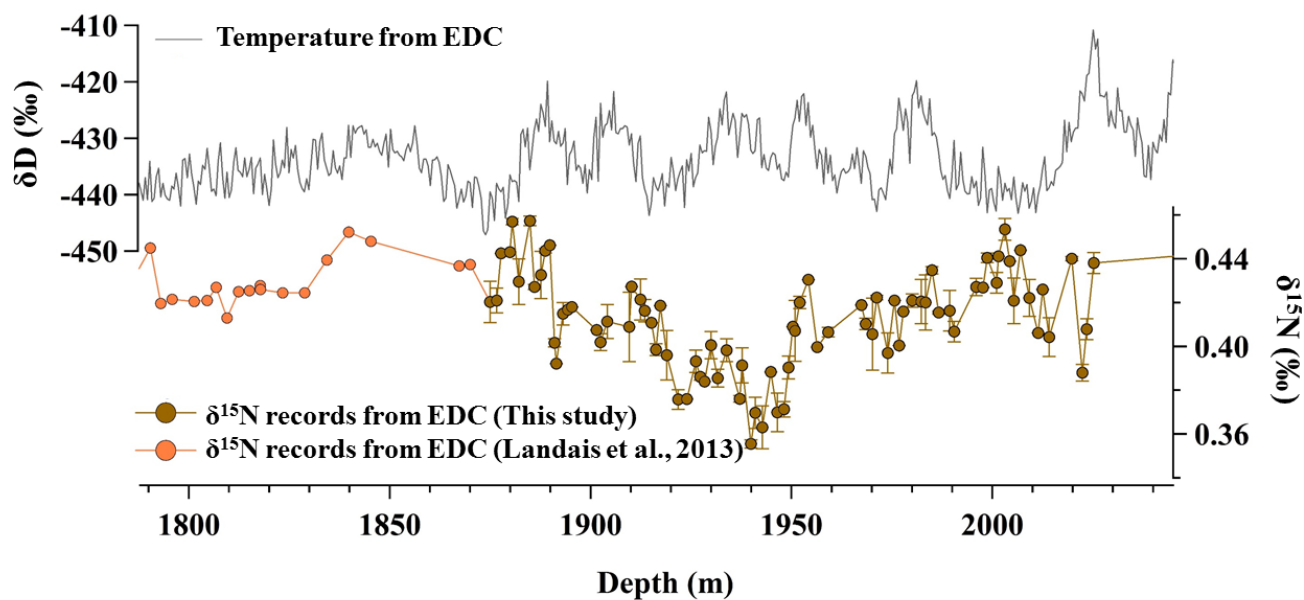

**Figure S2.**  $\delta D$  (here used as a proxy for Antarctic temperature) (Jouzel et al., 2007) and  $\delta^{15}N$  from the EPICA Dome C (EDC) ice core plotted as a function of depth. For  $\delta^{15}N$ , 88 new data points are added to the previous measurements (Landais et al., 2013). The error bar indicates the standard deviation of duplicate measurements.

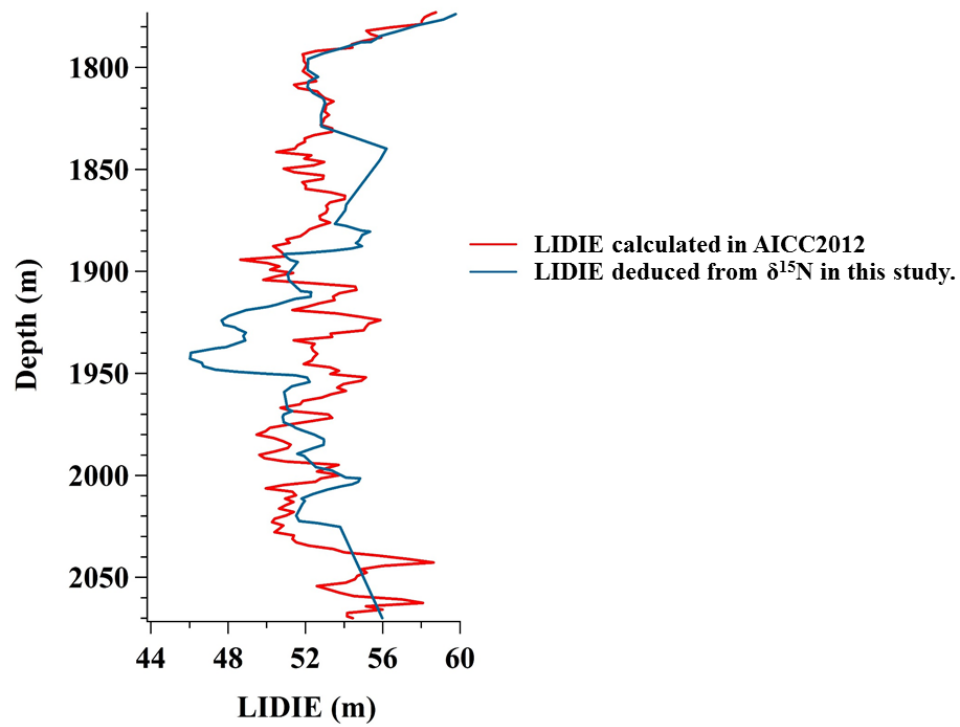

**Figure S3.** The Lock-In Depth in Ice Equivalent (LIDIE) calculated in the AICC2012 age scale (Bazin et al., 2013) and the LIDIE deduced from  $\delta^{15}\text{N}$  in this study.

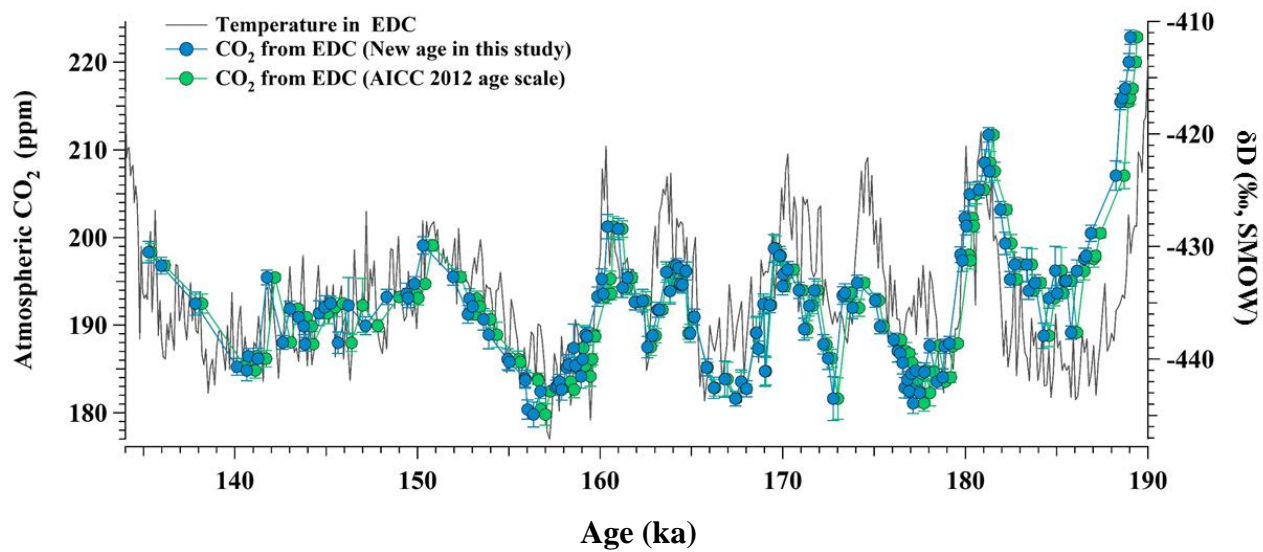

**Figure S4.** Blue dots: Atmospheric CO<sub>2</sub> measured on the EPICA Dome C (EDC) ice core on the revised age scale (this study). Green dots: Same data on the AICC2012 age scale (Bazin et al. 2013). Grey line: δD of water from EDC (here used as a Antarctic temperature proxy) (Jouzel et al., 2007).

5

10

15

20

**Table S1.** Ages of the tie points of MD01–2444 record (Margari et al., 2010) on the EDC03 (Parrenin et al., 2007) and AICC2012 ice age scales (Bazin et al., 2013).

| MD01–2444<br>(m) | Previous age tie points by<br>Margari et al. (2010)<br>(EDC03 age scale, ka) | New age tie points<br>(AICC2012, ka) |
|------------------|------------------------------------------------------------------------------|--------------------------------------|
| 22.02            | 136.100                                                                      | 135.761                              |
| 22.50            | 141.686                                                                      | 141.677                              |
| 23.70            | 149.586                                                                      | 150.287                              |
| 24.48            | 159.105                                                                      | 160.327                              |
| 24.72            | 162.476                                                                      | 163.878                              |
| 25.32            | 168.273                                                                      | 170.349                              |
| 25.71            | 172.009                                                                      | 174.649                              |
| 25.95            | 175.461                                                                      | 178.423                              |
| 26.01            | 177.065                                                                      | 180.033                              |
| 27.03            | 188.009                                                                      | 190.229                              |
| 27.30            | 192.231                                                                      | 194.186                              |

**Definition of minima and maxima of atmospheric CO<sub>2</sub> and temperature**

A two-steps procedure was used in order to select the maxima and minima of temperature during the penultimate glacial periods, and calculate the associated age uncertainty (Figure S5—S6 and Table S2—S3 in SI (Supplement Information)). First, inflection points were selected by finding zero values in the second Savitsky–Golay filtered derivative of the data. The parameters of the Savitsky–Golay filters were chosen in order to remove sub–millennial scale variations that represent noise in the data and are of non-atmospheric origin. Second, a Monte Carlo-type simulation was conducted, in which the original data were resampled within their uncertainty, and the absolute minima and maxima between pairs of inflection points were selected. This allows us to estimate the uncertainty related to the location of each minimum/maximum. The age uncertainty associated with sampling (taken to be the mean sampling resolution) was added (sum of squares) to the uncertainty calculated in the Monte Carlo procedure to calculate a total uncertainty value.

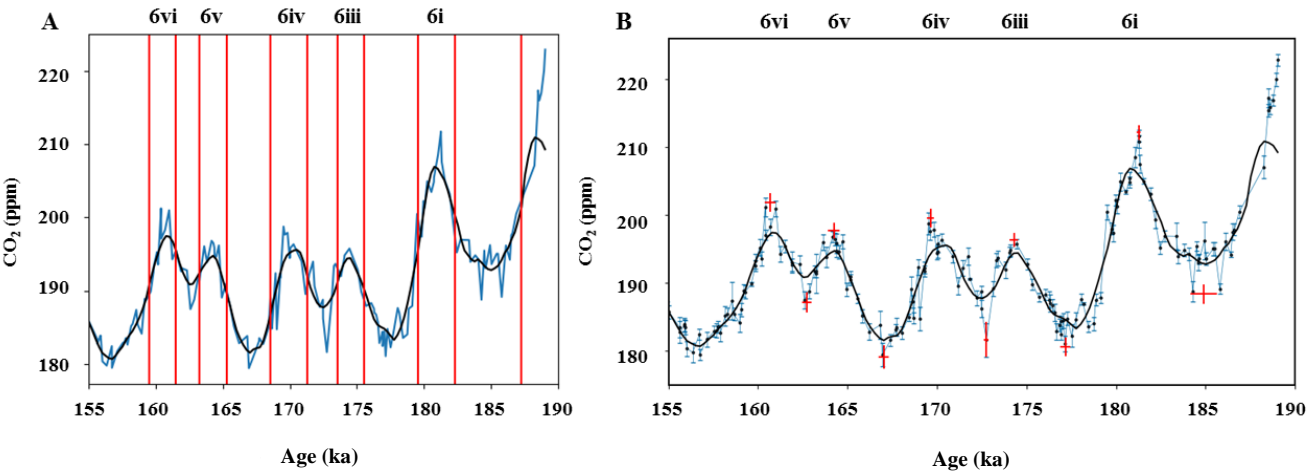

**Figure S5.** Selecting the maxima and minima of a composite atmospheric CO<sub>2</sub> from the EDC during MIS 6. The black curve in both panels shows the Savitsky-Golay filtered atmospheric CO<sub>2</sub> series. A: Red vertical lines mark inflection points and the blue curve shows the original data. B: Blue dots indicate the composite atmospheric CO<sub>2</sub> data. Red dots indicate the minimum/maximum of Atmospheric CO<sub>2</sub>. The error bars indicate the timing and uncertainty for each minimum/maximum. The event numbers are written at the top.

**Table S2.** The minima and maxima locations of atmospheric CO<sub>2</sub> during the MIS 6.

|          | CDM 6vi |        | CDM 6v |        | CDM 6iv |        | CDM 6iii |        | CDM 6i |        |
|----------|---------|--------|--------|--------|---------|--------|----------|--------|--------|--------|
|          | Max     | Min    | Max    | Min    | Max     | Min    | Max      | Min    | Max    | Min    |
| Age (ka) | 160.67  | 162.72 | 164.23 | 167.02 | 169.64  | 172.75 | 174.29   | 177.18 | 181.26 | 184.89 |
| 2σ (kyr) | 0.31    | 0.26   | 0.33   | 0.29   | 0.19    | 0.14   | 0.23     | 0.28   | 0.12   | 0.75   |

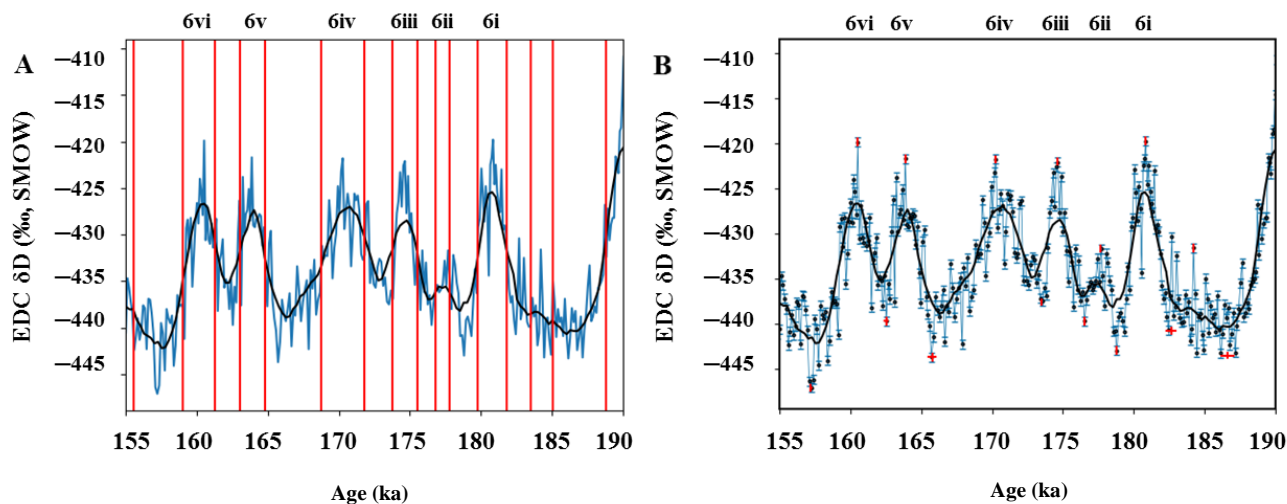

**Figure S6.** Selecting the maxima and minima of  $\delta D$  from the EDC during MIS 6. The black curve in both panels shows the Savitsky-Golay filtered  $\delta D$  series. A: Red vertical lines mark inflection points and the blue curve shows the original data. B: Blue dots indicate the original data. Red dots are the minimum/maximum of  $\delta D$ . The error bars indicate the timing and  $\delta D$  uncertainty for each minimum/maximum. The event numbers are written at the top.

**Table S3.** The minima and maxima locations of  $\delta D$  in the EDC during the MIS 6.

|                 | AIM 6vi |        | AIM 6v |        | AIM 6iv |        | AIM 6iii |        | AIM 6ii |        | AIM 6i |        |
|-----------------|---------|--------|--------|--------|---------|--------|----------|--------|---------|--------|--------|--------|
|                 | Max     | Min    | Max    | Min    | Max     | Min    | Max      | Min    | Max     | Min    | Max    | Min    |
| Age (ka)        | 160.53  | 162.52 | 163.88 | 165.80 | 170.27  | 173.49 | 174.62   | 176.52 | 177.67  | 178.81 | 180.85 | 184.61 |
| $2\sigma$ (kyr) | 0.06    | 0.15   | 0.06   | 0.38   | 0.06    | 0.09   | 0.09     | 0.12   | 0.08    | 0.07   | 0.06   | 0.62   |

**Table S4.** Definition of the duration of each NA stadial using the AICC2012 chronology.

| Event name | Definition of NA stadial duration                                                    |                 |                                  |                 |                                                                              |                 |
|------------|--------------------------------------------------------------------------------------|-----------------|----------------------------------|-----------------|------------------------------------------------------------------------------|-----------------|
|            | A: Using $\delta^{18}\text{O}$ of planktic foraminifera and tree pollen in MD01–2444 |                 | B: Using $\delta\text{D}$ in EDC |                 | C: Using the mean of the durations estimated by the methods used for A and B |                 |
|            | Duration kyr                                                                         | Uncertainty kyr | Duration kyr                     | Uncertainty kyr | Duration kyr                                                                 | Uncertainty kyr |
| MIS 6vi    | 1.75                                                                                 | 0.29            | 1.99                             | 0.16            | 1.87                                                                         | 0.33            |
| MIS 6v     | 2.77                                                                                 | 0.27            | 1.92                             | 0.38            | 2.35                                                                         | 0.47            |
| MIS 6iv    | 3.3                                                                                  | 0.23            | 3.21                             | 0.11            | 3.26                                                                         | 0.26            |
| MIS 6iii   | 2.62                                                                                 | 0.29            | 1.90                             | 0.15            | 2.26                                                                         | 0.33            |
| MIS 6ii    | 1.1                                                                                  | 0.25            | 1.14                             | 0.10            | 1.12                                                                         | 0.27            |
| MIS 6i     | 2.39                                                                                 | 0.2             | 3.76                             | 0.63            | 3.07                                                                         | 0.66            |

**Table S5.** Existing CO<sub>2</sub> data sets from EDC, Vostok ice core and new CO<sub>2</sub> data from EDC during MIS 6.

| Ice core | Method<br>(Reference)                         | CO <sub>2</sub> difference<br>with CO <sub>2</sub> from<br>EDC by ball mill in<br>this study (ppm) | Contamination<br>correction | Gravitational<br>fractionation<br>effect<br>correction | Number<br>of<br>replicates | Number<br>of<br>samples |
|----------|-----------------------------------------------|----------------------------------------------------------------------------------------------------|-----------------------------|--------------------------------------------------------|----------------------------|-------------------------|
| EDC      | Sublimation at CEP<br>Schneider et al. (2013) | 4.7± 1.7 (1σ)                                                                                      | yes                         | This study                                             | 2–5                        | 14                      |
|          | Ball mill at IGE<br>Lourantou et al. (2010)   | 2.4±2.1 (1σ)                                                                                       | no                          | Original<br>publication                                | 1                          | 11                      |
|          | Ring mill at IGE<br>(This study)              | 8.2±1.1 (1σ)                                                                                       | yes                         | This study                                             | 1                          | 11                      |
|          | Needle cracker at CEP<br>(This study)         | 7.8± 1.1 (1σ)                                                                                      | yes                         | This study                                             | 2–4                        | 35                      |
|          | CIM at CEP<br>(This study)                    | 5.4± 1.0 (1σ)                                                                                      | yes                         | This study                                             | 2–4                        | 26                      |
| Vostok   | Ball mill at CEP<br>Petit et al. (1999)       | 4.6± 3.0 (1σ)                                                                                      | no                          | This study                                             | 1                          | 49                      |

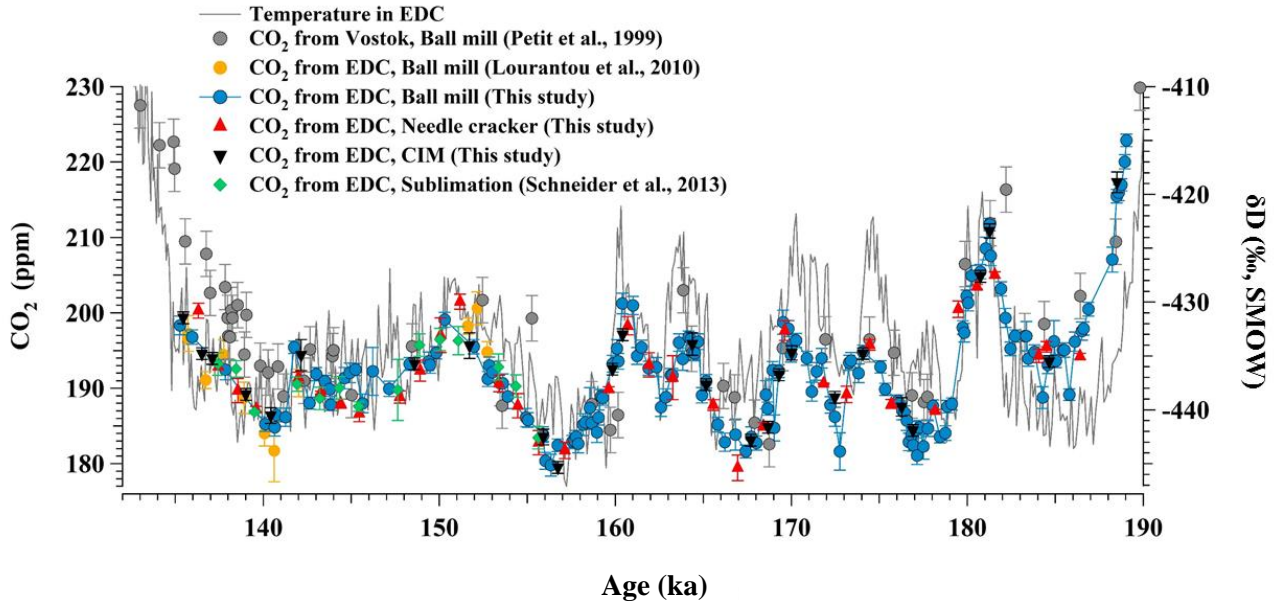

**Figure S7.** Offset corrected atmospheric CO<sub>2</sub> from EDC (composite) and Vostok ice cores, compared to the δD of water at EDC (temperature proxy) during 190–135 ka. Blue dots: Atmospheric CO<sub>2</sub> from EDC by ball mill system (this study). The error bars of the new CO<sub>2</sub> data using the ball mill extraction system indicate the standard deviation of five consecutive injections of the gas extracted from each sample into the gas chromatograph added to the precision of the measurement estimated by the reproducibility of the control measurement (~0.8 ppm) using a quadratic sum. Yellow dots: Atmospheric CO<sub>2</sub> from EDC by ball mill system (Lourantou et al., 2010). The error bars indicate the standard deviation of five consecutive injections of the gas extracted from each sample into the gas chromatograph. Red equilateral triangles: Atmospheric CO<sub>2</sub> from EDC by needle cracker (this study). The error bars of data points with replicates indicate the standard deviation of the mean of replicates from the same depth interval. Black inverted triangles: Atmospheric CO<sub>2</sub> from EDC by CIM (this study). The error bars of data points with replicates indicate the standard deviation of the mean of replicates from the same depth interval. Green rhombuses: Atmospheric CO<sub>2</sub> from EDC by sublimation (Schneider et al., 2013). The error bars of data points with replicates indicate the standard deviation of the mean of replicates from the same depth interval (Schneider et al., 2013). Grey dots: Atmospheric CO<sub>2</sub> from the Vostok ice core (Petit et al., 1999). The error bars of the CO<sub>2</sub> data from Vostok (Petit et al., 1999) show the estimated overall accuracy for CO<sub>2</sub> measurements. Grey line: δD of water at EDC (Jouzel et al., 2007).

## A composite data set during MIS 6

Due to the variety of CO<sub>2</sub> data available for MIS 6 from the EDC ice core, we compiled all data by correcting previously measured (published and unpublished) data to match our new data set. There are two previously published CO<sub>2</sub> data sets available from the EDC ice core during MIS6, one measured at IGE using the ball mill system (Lourantou et al., 2010) and the other at CEP employing a sublimation extraction (Schneider et al., 2013) (Figure 4 and Table S5 in SI). In addition, we include unpublished atmospheric CO<sub>2</sub> measurements from the EDC ice core using the needle cracker (Monnin et al., 2004; Siegenthaler et al., 2005) in 2003. All records are on the AICC2012 gas age scale (Bazin et al., 2013). All data sets are corrected for the gravitational fractionation effect using the new  $\delta^{15}\text{N}$  data in our study.

Because of the limited sample availability, the data reconstructed by the ball mill method are single measurements per depth interval, however, due to the relatively large sample size we thereby integrate over cm-scale CO<sub>2</sub> variability found in the ice core (Lüthi et al., 2010; Schaefer et al., 2011). The error bars of the new CO<sub>2</sub> data using the ball mill extraction system indicate the standard deviation of five consecutive injections of the gas extracted from each sample into the gas chromatograph added to the precision of the measurement estimated by the reproducibility of the control measurement ( $\sim 0.8$  ppm) using a quadratic sum. The error bars of previously published CO<sub>2</sub> data using ball mill without replicates indicate the standard deviation of five consecutive injections of the gas extracted from each sample into the gas chromatography (Lourantou et al., 2010; Petit et al., 1999). CO<sub>2</sub> records made using the CIM, needle cracker and the sublimation method were reconstructed from 2–5 replicates from neighbouring depth sections. The error bars of data with replicates indicate the standard deviation of the mean of replicates from the same depth interval (Schneider et al., 2013).

Figure 4 shows CO<sub>2</sub> concentrations measured by the ball mill system, the sublimation, the CIM and the needle cracker. These CO<sub>2</sub> concentrations by the ball mill system (Lourantou et al., 2010), the sublimation (Schneider et al., 2013), the CIM and the needle cracker are systematically higher than CO<sub>2</sub> concentrations measured by the ball mill system in our study (Table S5 in SI and Figure 4). The estimated offset between the existing CO<sub>2</sub> dataset from EDC by Lourantou et al. (2010) and our new ball mill dataset is  $\sim 2.4 \pm 2.1$  ppm. The CO<sub>2</sub> data from EDC by Lourantou et al. (2010) were also reconstructed using the ball mill system. However, the earlier dataset was not corrected for the CO<sub>2</sub> contamination caused by the analytical procedure. We estimated the level of CO<sub>2</sub> contamination to be between 1 and 2 ppm for our study. Considering that the previous dataset was not corrected, the offset between the two data sets is negligible. Atmospheric CO<sub>2</sub> during the MIS 6 period shows an offset between CO<sub>2</sub> data in this study and other CO<sub>2</sub> sets, which might be related to different analytical methods.

Where the additional datasets have sufficient resolution, the millennial-scale variations shown in our MIS 6 dataset are well reproduced. Nevertheless, the measurements in the different datasets cannot be immediately aggregated because of offsets between their absolute CO<sub>2</sub> values. These offsets do not present any significant temporal evolution over MIS 6, but rather appear to be constant. In order to estimate these offsets while accounting for both measurement uncertainty and uncertainty in the offsets themselves, we rely on a Monte Carlo-type procedure, which is run for 1000 iterations. At each iteration, the data points from all datasets are varied within their measurement uncertainty. Then, a Savitsky-Golay filter with an approximate cutoff period of 150 years (using a 7-point sliding window and cubic fit, sampled at 250-year resolution) is applied to the new

EDC data from this study. The offsets between each additional data set and our data are calculated. At the end of the stochastic procedure, the mean and standard deviation of each offset are calculated, and used to adjust each dataset to create the composite CO<sub>2</sub> dataset (Table S5 and Figure S5 in SI).

5 In order to test the sensitivity of the stack to the interpolation methods, similar procedures were also run using linear interpolation, cubic spline filtering, and enting spline filtering instead of the the Savitsky-Golay filter. The mean calculated offsets did not vary by more than 0.2 ppm between different methods, which is well within the uncertainty ranges calculated for the offsets themselves.

10 There are two main sources of uncertainty in the composite dataset: (i) the measurement uncertainty of the data, and (ii) the uncertainty of the offset itself. Therefore, these two sources of uncertainty are presented separately, and not combined into a single estimate. All calculations using the stack take both sources of uncertainty into account.

We also use this procedure to estimate an offset between our data and the data measured on the Vostok ice core (Table S5 in SI and Figure 4). However, this offset does appear to evolve over time, changing during late MIS 6. Additionally, uncertainties in the alignment of the Vostok and EDC age scales over MIS 6 make it unclear if the variations in the two data series are indeed contemporaneous. We therefore do not include the Vostok data in the composite record.

## Offsets between CO<sub>2</sub> records

Atmospheric CO<sub>2</sub> is a well mixed greenhouse gas in the atmosphere and ice-core derived CO<sub>2</sub> reconstructions should therefore agree with each other, at least within the measurement uncertainty. However, small offsets are often found among various different ice cores for different climatic background conditions (Ahn et al., 2012; Bereiter et al., 2012; Marcott et al., 2014). The causes of such offsets often remain elusive. Offset causing mechanisms may alter the CO<sub>2</sub> concentration at any point in time, including in the ice sheet itself (*in-situ* production), during the drilling of the ice core (e.g. by contamination with drilling fluid), while storing the ice (e.g. through gas loss), or during the post-analytic data processing (e.g. data standardization). A comprehensive overview of potential offset causing mechanisms can be found in Bereiter et al. (2012) and Eggleston et al. (2016).

Most offset causing mechanisms lead to an increase in the measured CO<sub>2</sub> concentration, i.e. CO<sub>2</sub> is added at some stage. The only plausible mechanisms that could explain lower values are the way the measurement signal is converted into a mole fraction (calibration and standardization) or gas extraction methodologies. The most likely explanation may involve ice relaxation (clathrate decay) during the long storage period (Bereiter et al., 2015) and the choice of extraction device.

During clathrate formation, the gas is partitioned into clathrates due to the different gas diffusivities and solubilities (Salamatin et al., 2001). CO<sub>2</sub> has consistently been observed to be depleted in bubbles and enriched in clathrates (Schaefer et al., 2011). Degassing from clathrates during extraction takes much longer than air release from bubbles; thus, if air from the clathrate ice is not extracted entirely, CO<sub>2</sub> measurement will be lower than the true value.

The ball mill shows extraction efficiencies of ~62% for bubbles and ~52% for clathrates on average (Schaefer et al., 2011). If the ball mill is used to reconstruct CO<sub>2</sub> in Bubble–Clathrate Transformation Zone (BTCZ), CO<sub>2</sub> concentrations can be biased. CO<sub>2</sub> concentrations from EDC were reconstructed from 177 depth intervals that cover 2036.7 to 1787.5 m along the EDC ice core, which consist of clathrate ice. There exists true small scale variability in CO<sub>2</sub> concentrations in the ice below the Clathrate Zone (Lüthi et al., 2010). Due to slow bubble formation, this small variation of atmospheric CO<sub>2</sub> is smoothed. Thus, CO<sub>2</sub> concentrations in these depth intervals should represent the initial mean atmospheric concentration. However, the EDC ice core had been stored for ~20 years in cold rooms at  $-22.5 \pm 2.5^\circ\text{C}$  before the gas was analysed. More than 50% of the initial hydrates present in the freshly drilled ice may have been decomposed and transformed into secondary bubbles, or gas cavities (Lipenkov, *Pers. Comm.*). We expect the same fractionation as during the clathrate formation process, hence bubbles would be depleted in CO<sub>2</sub>. Thus, CO<sub>2</sub> concentrations from EDC may be lower. The portion of the Vostok ice core covering MIS 6 is also clathrate ice, but it was measured not long after drilling (Petit et al., 1999), and less clathrates may have transformed into secondary bubbles. Thus CO<sub>2</sub> concentrations from Vostok during MIS 6 may be higher and potentially reflect the true atmospheric concentration more closely. In our study we concentrate on the relative millennial changes of CO<sub>2</sub> around the mean glacial concentration, which are the same in all the CO<sub>2</sub> records available so far. Thus, our conclusion in this paper are independent of which absolute mean CO<sub>2</sub> level is correct. As the new data in this study are currently the best quality data in terms of repeatability, we use this data as the reference record for the correction of all remaining records. We stress that the absolute mean CO<sub>2</sub> level during MIS6 is not known better than 5 ppm.

## Definition of the onset of abrupt climate change in the NH

Over the last glacial period, rapid CH<sub>4</sub> rises are synchronous with abrupt temperature increases in Greenland within  $\pm 50$  ppb (Huber et al., 2006) and may even occur simultaneously (Rosen et al., 2014). Here, we choose intervals of rapid CH<sub>4</sub> increases greater than 50 ppb over a time period of less than 1 kyr that correspond with Antarctic Isotope Maxima (EPICA Community Members, 2006; Loulergue et al., 2008). The timing of abrupt CH<sub>4</sub> increases was defined as the midpoint between the beginning of the increase of CH<sub>4</sub> and its maximum. The age uncertainty of the midpoint is defined by the time difference between the midpoint and either of the two endpoints (cf. Bereiter et al. 2012).

We found three abrupt CH<sub>4</sub> increases during MIS 6 at  $171.1 \pm 0.2$ ,  $175.4 \pm 0.4$  and  $181.5 \pm 0.3$  ka (Figure S8 in SI). Due to the low accumulation rate and low temperature at the site during glacial periods, abrupt changes of CH<sub>4</sub> concentration might be smoothed, and identifying abrupt changes of CH<sub>4</sub> is more difficult than for interglacial periods. The climate change at 175.4 ka does not seem to occur as abruptly as the other two, since CH<sub>4</sub> varied slowly over  $\sim 800$  years. However, we include this event because corresponding data of  $\delta^{18}\text{O}$  composition of planktonic foraminifera (Shackleton et al., 2000) indicate a rapid warming, and therefore an abrupt climate change in NH (Figure 3). Rapid increases during the last glacial period (MIS 3 and 5) are also calculated using this method to identify the onset of abrupt warming in NH. In total, eight abrupt rises are selected during this period (Figure S8–S11 in SI).

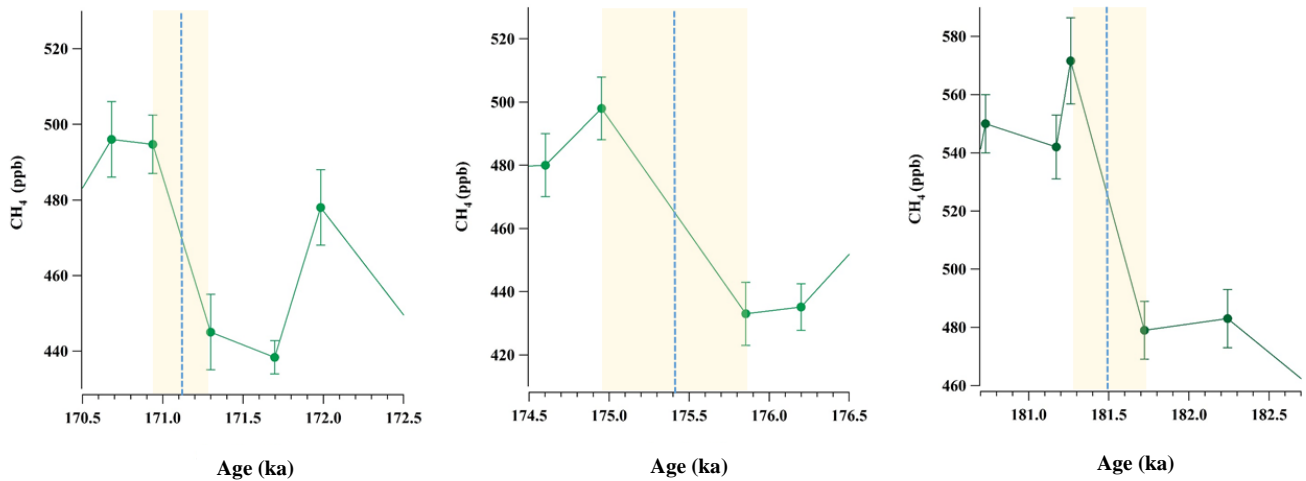

**Figure S8.** Atmospheric CH<sub>4</sub> records from EDC during MIS 6 period. Three boxes show CH<sub>4</sub> jumps at  $171.1 \pm 0.2$ ,  $175.4 \pm 0.4$  and  $181.5 \pm 0.3$  ka.

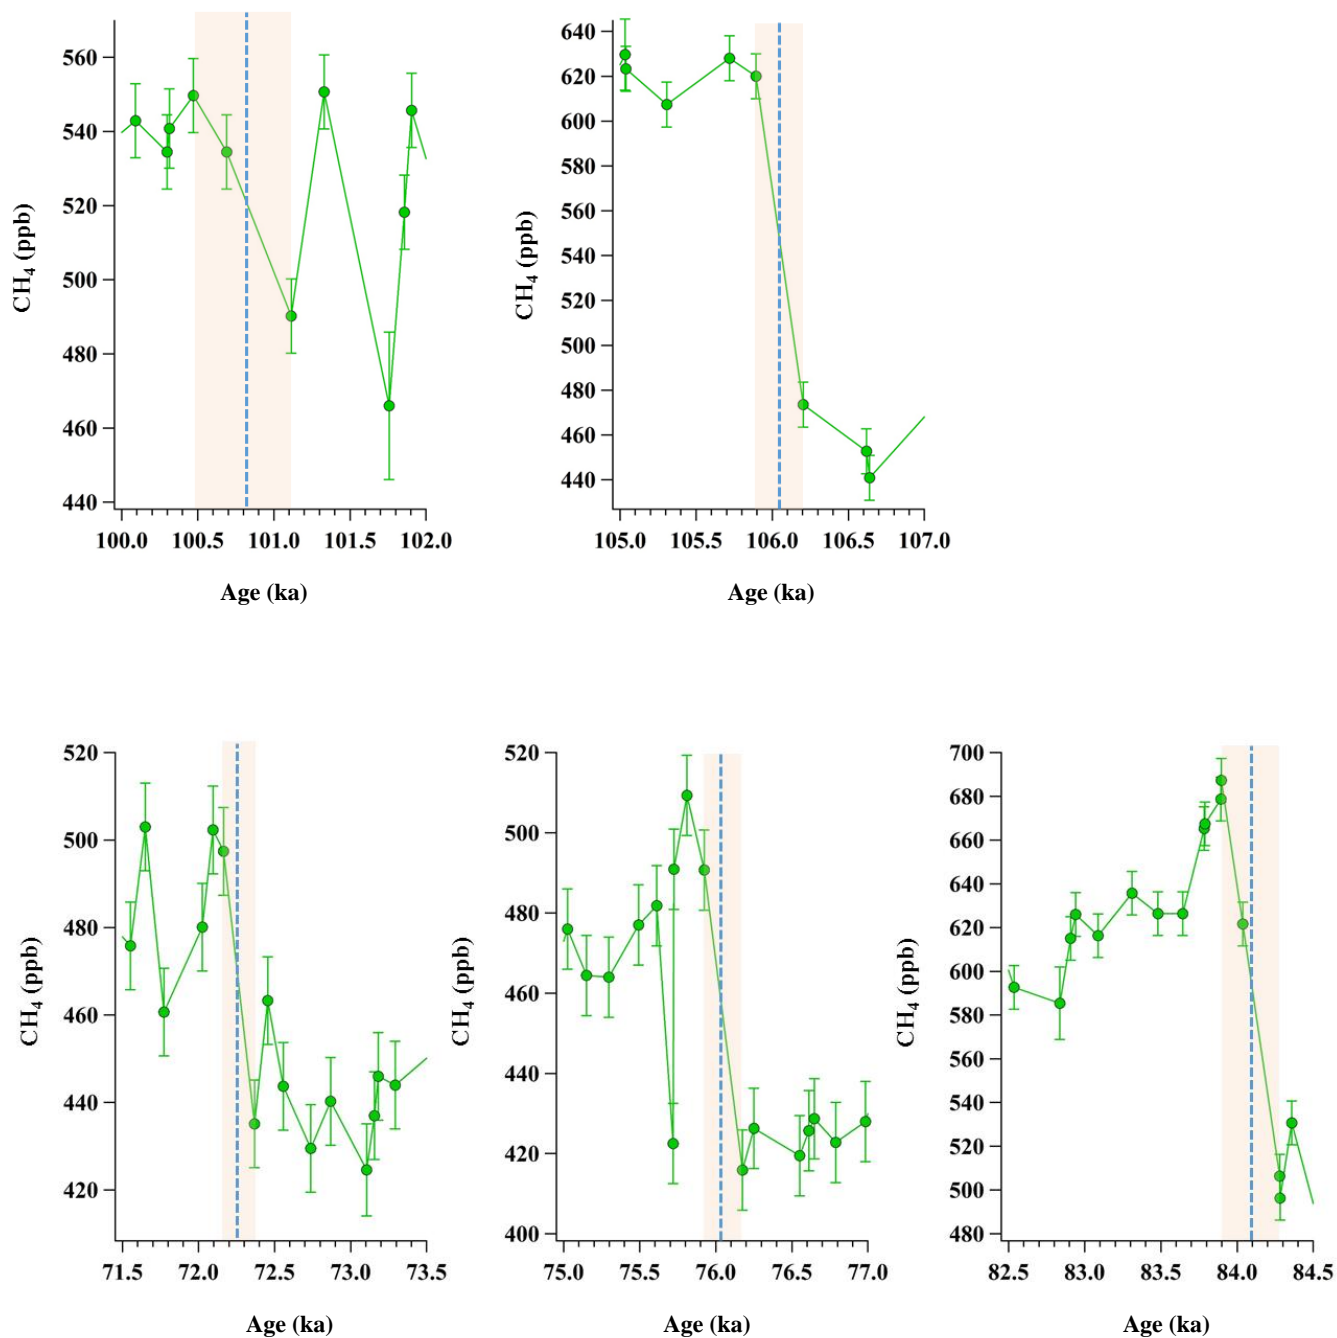

**Figure S9.** Atmospheric CH<sub>4</sub> records from EDML during the MIS 5 period. Five boxes show CH<sub>4</sub> jumps at  $72.3 \pm 0.1$ ,  $76.0 \pm 0.1$ ,  $84.1 \pm 0.2$ ,  $100.8 \pm 0.5$  and  $106.0 \pm 0.2$  ka.

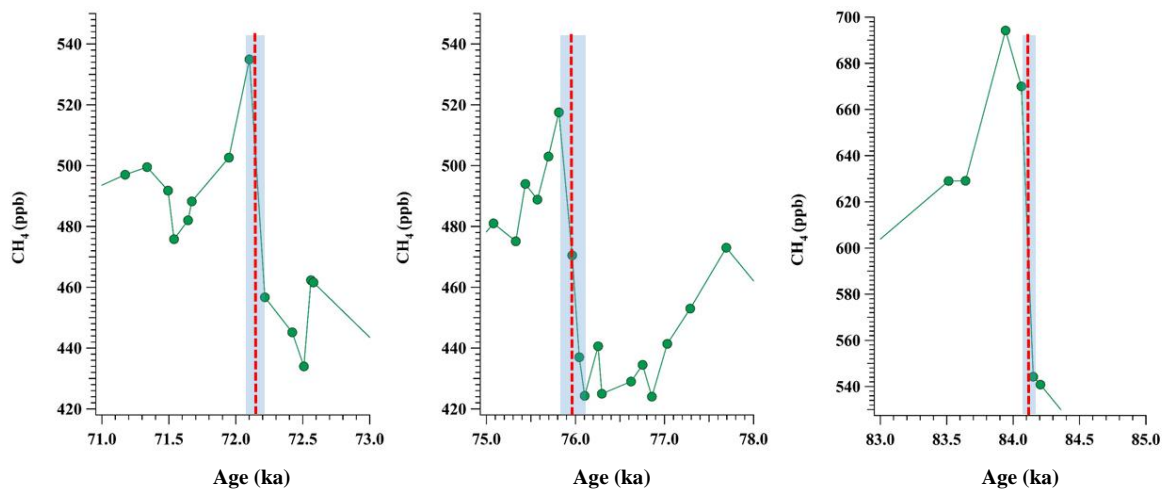

**Figure S10.** Atmospheric CH<sub>4</sub> records from the Byrd ice core during MIS 5 period. Three boxes show CH<sub>4</sub> jumps at  $72.2 \pm 0.1$ ,  $76.0 \pm 0.2$  and  $84.1 \pm 0.04$  ka.

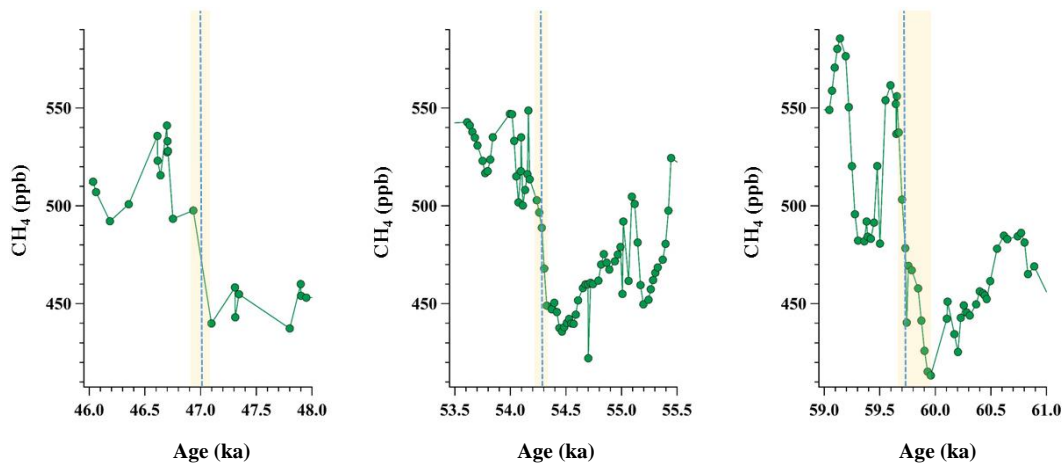

**Figure S11.** Atmospheric CH<sub>4</sub> records from TALDICE during MIS 3 period. Three boxes show CH<sub>4</sub> jumps at  $46.7 \pm 0.2$ ,  $54.2 \pm 0.1$  and  $59.7 \pm 0.1$  ka.

## References

- Ahn, J., Brook, E. J., Mitchell, L., Rosen, J., McConnell, J. R., Taylor, K., Etheridge, D., and Rubino, M.: Atmospheric CO<sub>2</sub> over the last 1000 years: A high-resolution record from the West Antarctic Ice Sheet (WAIS) Divide ice core, *Global Biogeochem. Cycles*, 26, GB2027, <https://doi.org/10.1029/2011GB004247>, 2012.
- 5 Bazin, L., Landais, A., Lemieux-Dudon, B., Kele, H. T. M., Veres, D., Parrenin, F., Martinerie, P., Ritz, C., Capron, E., and Lipenkov, V.: An optimized multi-proxy, multi-site Antarctic ice and gas orbital chronology (AICC2012): 120-800 ka, *Clim. Past*, 9, 1715–1731, <https://doi.org/10.5194/cp-9-1715-2013>, 2013.
- Bereiter, B., Eggleston, S., Schmitt, J., Nehrbass-Ahles, C., Stocker, T. F., Fischer, H., Kipfstuhl, S., and Chappellaz, J.:  
10 Revision of the EPICA Dome C CO<sub>2</sub> record from 800 to 600 kyr before present, *Geophys. Res. Lett.*, 42, 542-549, doi:10.1002/2014GL061957, 2015.
- Bereiter, B., Lüthi, D., Siegrist, M., Schüpbach, S., Stocker, T. F., and Fischer, H.: Mode change of millennial CO<sub>2</sub> variability during the last glacial cycle associated with a bipolar marine carbon seesaw, *Proc. Natl. Acad. Sci.*, 109, 9755-9760, doi:10.1073/pnas.1204069109, 2012.
- 15 Eggleston, S., Schmitt, J., Bereiter, B., Schneider, R., and Fischer, H.: Evolution of the stable carbon isotope composition of atmospheric CO<sub>2</sub> over the last glacial cycle, *Paleoceanography*, 31, 434-452, <https://doi.org/10.1002/2015PA002874>, 2016.
- EPICA Community Members: One-to-one coupling of glacial climate variability in Greenland and Antarctica, *Nature*, 444, 195-198, doi:10.1038/nature05301, 2006.
- Jouzel, J., Masson-Delmotte, V., Cattani, O., Dreyfus, G., Falourd, S., Hoffmann, G., Minster, B., Nouet, J., Barnola, J.-M.,  
20 and Chappellaz, J.: Orbital and millennial Antarctic climate variability over the past 800,000 years, *Science*, 317, 793-796, doi:10.1126/science.1141038, 2007.
- Landais, A., Dreyfus, G., Capron, E., Jouzel, J., Masson-Delmotte, V., Roche, D. M., Prié, F., Caillon, N., Chappellaz, J., Leuenberger, M., Laurantou, A., Parrenin, F., Raynaud, D., and Teste, G.: Two-phase change in CO<sub>2</sub>, Antarctic temperature and global climate during Termination II, *Nat. Geosci.*, 6, 1062–1065, <https://doi.org/10.1038/ngeo1985>, 2013.
- 25 Louergue, L., Schilt, A., Spahni, R., Masson-Delmotte, V., Blunier, T., Lemieux, B., Barnola, J.-M., Raynaud, D., Stocker, T. F., and Chappellaz, J.: Orbital and millennial-scale features of atmospheric CH<sub>4</sub> over the past 800,000 years, *Nature*, 453, 383–386, doi:10.1038/nature06950, 2008
- Lüthi, D., Bereiter, B., Stauffer, B., Winkler, R., Schwander, J., Kindler, P., Leuenberger, M., Kipfstuhl, S., Capron, E., and Landais, A.: CO<sub>2</sub> and O<sub>2</sub>/N<sub>2</sub> variations in and just below the bubble-clathrate transformation zone of Antarctic ice cores, *Earth  
30 Planet. Sci. Lett.*, 297, 1–2, 226–233, <https://doi.org/10.1016/j.epsl.2010.06.023>, 2010.
- Marcott, S. A., Bauska, T. K., Buizert, C., Steig, E. J., Rosen, J. L., Cuffey, K. M., Fudge, T. J., Severinghaus, J. P., Ahn, J., Kalk, M. L., McConnell, J. R., Sowers, T., Taylor, K. C., White, J. W., and Brook, E. J.: Centennial scale changes in the global carbon cycle during the last deglaciation, *Nature*, 514, 616–619, doi:10.1038/nature13799, 2014.
- Margari, V., Skinner, L., Tzedakis, P., Ganopolski, A., Vautravers, M., and Shackleton, N.: The nature of millennial-scale  
35 climate variability during the past two glacial periods, *Nat. Geosci.*, 3, 127–131, <https://doi.org/10.1038/ngeo740>, 2010.
- Monnin, E., Steig, E. J., Siegenthaler, U., Kawamura, K., Schwander, J., Stauffer, B., Stocker, T. F., Morse, D. C., Barnola, J.-M., Bellier, B., Raynaud, D., and Fischer, H.: Evidence for substantial accumulation rate variability in Antarctica during the Holocene through synchronization of CO<sub>2</sub> in the Taylor Dome, Dome C and DML ice cores, *Earth Planet. Sc. Lett.*, 224, 45–54, 2004
- 40 Parrenin, F., Barnola, J.-M., Beer, J., Blunier, T., Castellano, E., Chappellaz, J., Dreyfus, G., Fischer, H., Fujita, S., Jouzel, J., Kawamura, K., Lemieux-Dudon, B., Louergue, L., Masson-Delmotte, V., Narcisi, B., Petit, J.-R., Raisbeck, G., Raynaud, D., Ruth, U., Schwander, J., Severi, M., Spahni, R., Steffensen, J. P., Svensson, A., Udisti, R., Waelbroeck, C., and Wolff, E.: The EDC3 chronology for the EPICA Dome C ice core, *Clim. Past*, 3, 485–497, doi:10.5194/cp-3-485-2007, 2007.
- Petit, J. R., Jouzel, J., Raynaud, D., Barkov, N. I., Barnola, J.-M., Basile, I., Bender, M., Chappellaz, J., Davis, M., Delaygue,  
45 G., Delmotte, M., Kotlyakov, V. M., Legrand, M., Lipenkov, V. Y., Lorius, C., Pepin, L., Ritz, C., Saltzman, E., and

- Stievenard, M.: Climate and atmospheric history of the past 420000 years from the Vostok ice core, Antarctica, *Nature*, 399, 429–436, <https://doi.org/10.1038/20859>, 1999.
- Railsback, L. B., Gibbard, P. L., Head, M. J., Voarintsoa, N. R. G., and Toucanne, S.: An optimized scheme of lettered marine isotope substages for the last 1.0 million years, and the climatostratigraphic nature of isotope stages and substages, *Quaternary Sci.Rev.*, 111, 94–106, 2015.
- 5 Rosen, J. L., Brook, E. J., Severinghaus, J. P., Blunier, T., Mitchell, L. E., Lee, J. E., Edwards, J. S., and Gkinis, V.: An ice core record of near-synchronous global climate changes at the Bølling transition, *Nat. Geosci.*, 7, 459–463, <https://doi.org/10.1038/ngeo2147>, 2014.
- Schaefer, H., Laurantou, A., Chappellaz, J., Lüthi, D., Bereiter, B., and Barnola, J.-M.: On the suitability of partially clathrated ice for analysis of concentration and  $\delta^{13}\text{C}$  of palaeo-atmospheric  $\text{CO}_2$ , *Earth Planet. Sci. Lett.*, 307, 334–340, <https://doi.org/10.1016/j.epsl.2011.05.007>, 2011.
- 10 Shackleton, N. J., Hall, M. A., and Vincent, E.: Phase relationships between millennial-scale events 64,000–24,000 years ago, *Paleoceanography*, 15(6), 565–569, doi:10.1029/2000PA000513, 2000.
- Siegenthaler, U., Stocker, T. F., Monnin, E., Lüthi, D., Schwander, J., Stauffer, B., Raynaud, D., Barnola, J.-M., Fischer, H., and Masson-Delmotte, V.: Stable carbon cycle–climate relationship during the late Pleistocene, *Science*, 310, 1313–1317, doi: 10.1126/science.1120130, 2005.
- 15
